# Supplementary material for: Identification of State-Specific Proteomic and Transcriptomic Signatures of Microglia-Derived Extracellular Vesicles
Source: PubMed Central journal article supplement (PMC10755493; doi:10.1016/j.mcpro.2023.100678), 2023-11-11

Raw Western blot:  
BV2 cells  
EV lysates and cell lysates  
Probed with CD9 (22kda)

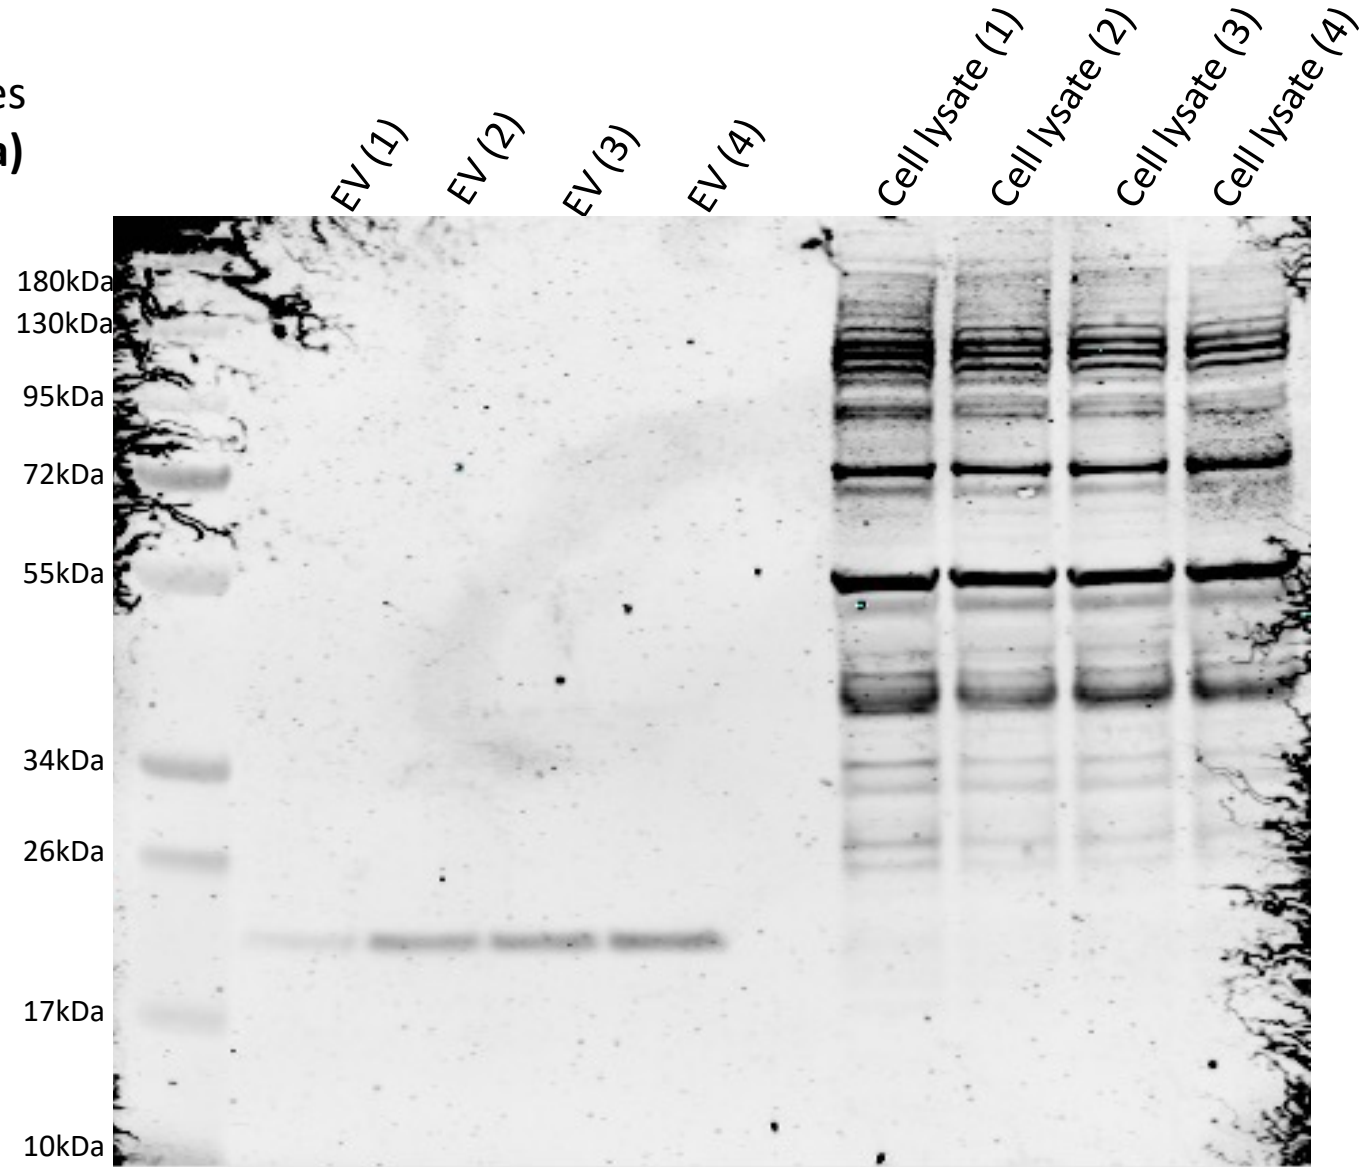

Raw Western Blot:  
BV2 cells  
EV lysates and cell lysates  
**Probed with TSG101 (49kDa)**

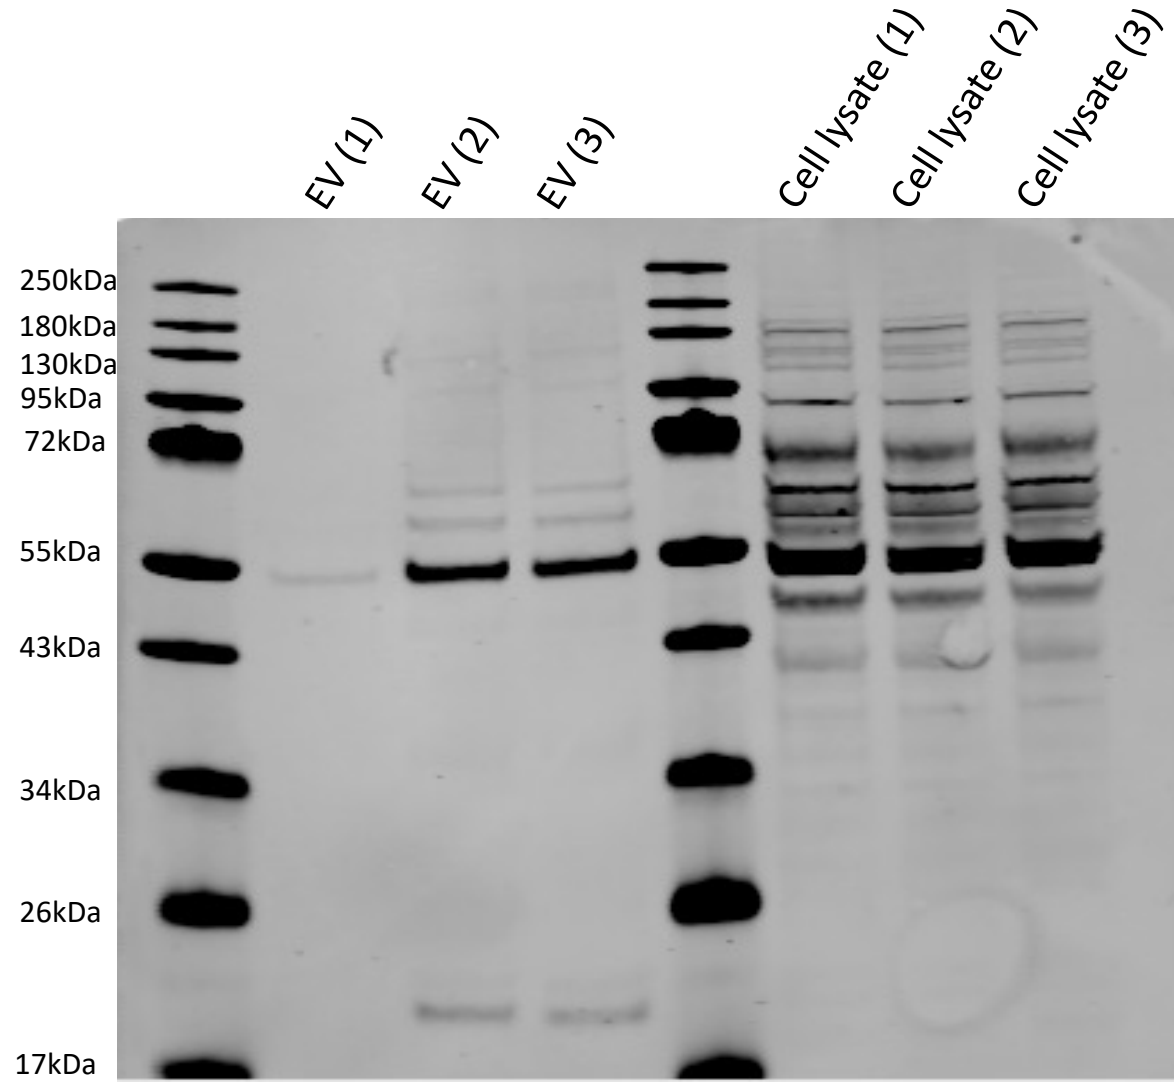

Raw western blot  
BV2 cells  
EV lysates and cell lysates  
**Probed with Calnexin (90Kda)**

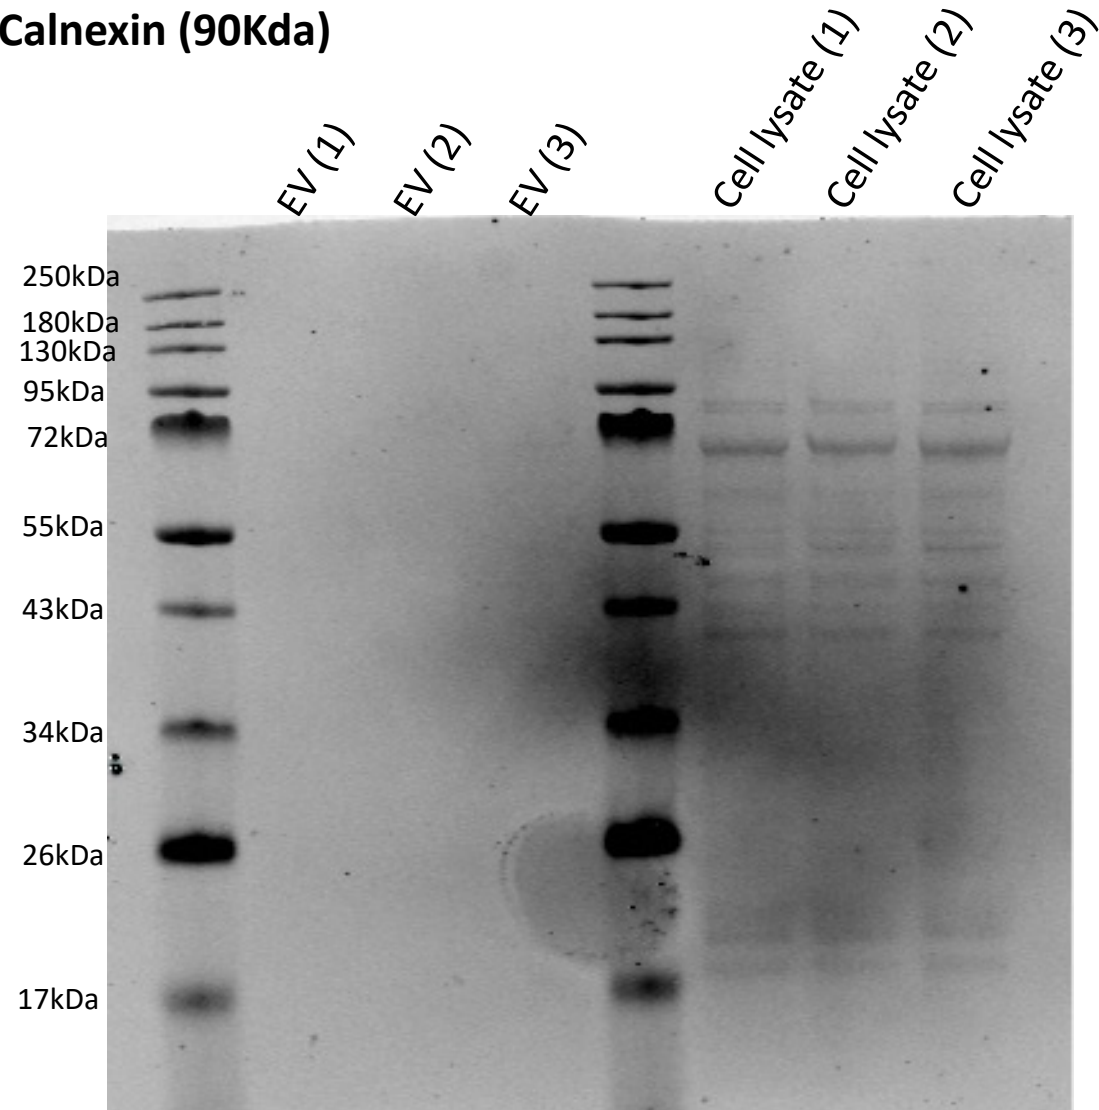

Supplement: mmc1.pdf [file mmc1.pdf]
