# Supplementary material for: Identification of State-Specific Proteomic and Transcriptomic Signatures of Microglia-Derived Extracellular Vesicles
Source: PubMed Central journal article supplement (PMC10755493; doi:10.1016/j.mcpro.2023.100678), 2023-11-11
Supplement: mmc7.pdf [file mmc7.pdf]

## Sample ID Table & QC Results

| Sample # | Admera Health Sample ID | Customer Sample ID | Sample Type | Sample Volume (ul) | Admera Health Concentration (ng/ul) | Admera Health Total Quantity (ng) | RIN  |
|----------|-------------------------|--------------------|-------------|--------------------|-------------------------------------|-----------------------------------|------|
| 1        | 22082R-05-01            | CTL Cell (1)       | RNA         | 30                 | 2800.0                              | 84000                             | 10.0 |
| 2        | 22082R-05-02            | CTL Cell (2)       | RNA         | 31                 | 1690.0                              | 52390                             | 10.0 |
| 3        | 22082R-05-03            | CTL Cell (3)       | RNA         | 33                 | 2380.0                              | 78540                             | 10.0 |
| 4        | 22082R-05-04            | LPS Cell (1)       | RNA         | 29                 | 1130.0                              | 32770                             | 10.0 |
| 5        | 22082R-05-05            | LPS Cell (2)       | RNA         | 33                 | 784.0                               | 25872                             | 10.0 |
| 6        | 22082R-05-06            | LPS Cell (3)       | RNA         | 33                 | 1010.0                              | 33330                             | 10.0 |
| 7        | 22082R-05-07            | IL-10 Cell (1)     | RNA         | 32                 | 1550.0                              | 49600                             | 10.0 |
| 8        | 22082R-05-08            | IL-10 Cell (2)     | RNA         | 32                 | 1950.0                              | 62400                             | 10.0 |
| 9        | 22082R-05-09            | IL-10 Cell (3)     | RNA         | 33                 | 1550.0                              | 51150                             | 10.0 |
| 10       | 22082R-05-10            | TGFB Cell (1)      | RNA         | 33                 | 1680.0                              | 55440                             | 10.0 |
| 11       | 22082R-05-11            | TGFB Cell (2)      | RNA         | 33                 | 2160.0                              | 71280                             | 10.0 |
| 12       | 22082R-05-12            | TGFB Cell (3)      | RNA         | 31                 | 2160.0                              | 66960                             | 10.0 |
| 13       | 22082R-05-13            | CTL EV (1)         | RNA         | 18                 | 0.1                                 | 2                                 | N/A  |
| 14       | 22082R-05-14            | CTL EV (2)         | RNA         | 31                 | 0.1                                 | 4                                 | N/A  |
| 15       | 22082R-05-15            | CTL EV (3)         | RNA         | 18                 | 0.2                                 | 4                                 | N/A  |
| 16       | 22082R-05-16            | LPS EV (1)         | RNA         | 18                 | 0.2                                 | 4                                 | N/A  |
| 17       | 22082R-05-17            | LPS EV (2)         | RNA         | 18                 | 0.9                                 | 16                                | 2.0  |
| 18       | 22082R-05-18            | LPS EV (3)         | RNA         | 18                 | 0.2                                 | 3                                 | N/A  |
| 19       | 22082R-05-19            | IL-10 EV (1)       | RNA         | 18                 | 0.1                                 | 2                                 | N/A  |
| 20       | 22082R-05-20            | IL-10 EV (2)       | RNA         | 18                 | 0.4                                 | 7                                 | N/A  |
| 21       | 22082R-05-21            | IL-10 EV (3)       | RNA         | 18                 | 0.3                                 | 6                                 | N/A  |
| 22       | 22082R-05-22            | TGFB EV (1)        | RNA         | 18                 | 0.3                                 | 5                                 | N/A  |
| 23       | 22082R-05-23            | TGFB EV (2)        | RNA         | 18                 | 0.3                                 | 5                                 | N/A  |
| 24       | 22082R-05-24            | TGFB EV (3)        | RNA         | 18                 | 0.2                                 | 4                                 | N/A  |

## TapeStation Image

Filename: 22082-05-01-12-IQC-TS-01252023.cRNA

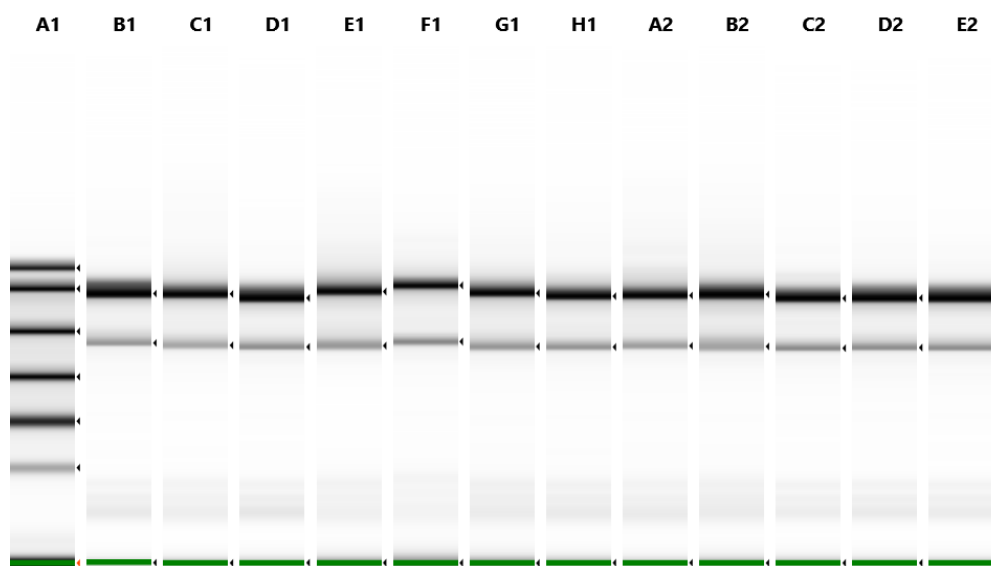

|                          |                          |                          |                          |                          |                          |                          |                          |                          |                          |                          |                          |                          |
|--------------------------|--------------------------|--------------------------|--------------------------|--------------------------|--------------------------|--------------------------|--------------------------|--------------------------|--------------------------|--------------------------|--------------------------|--------------------------|
| RIN <sup>e</sup><br>10.0 | RIN <sup>e</sup><br>10.0 | RIN <sup>e</sup><br>10.0 | RIN <sup>e</sup><br>10.0 | RIN <sup>e</sup><br>10.0 | RIN <sup>e</sup><br>10.0 | RIN <sup>e</sup><br>10.0 | RIN <sup>e</sup><br>10.0 | RIN <sup>e</sup><br>10.0 | RIN <sup>e</sup><br>10.0 | RIN <sup>e</sup><br>10.0 | RIN <sup>e</sup><br>10.0 | RIN <sup>e</sup><br>10.0 |
|--------------------------|--------------------------|--------------------------|--------------------------|--------------------------|--------------------------|--------------------------|--------------------------|--------------------------|--------------------------|--------------------------|--------------------------|--------------------------|

Default image (Contrast 50%), Image is Scaled to Sample

### Sample Info

| Well | RIN <sup>e</sup> | 28S/18S (Area) | Conc. [ng/μl] | Sample Description | Alert | Observations |
|------|------------------|----------------|---------------|--------------------|-------|--------------|
| A1   | -                | -              | 84.9          | Electronic Ladder  |       | Ladder       |
| B1   | 10.0             | 2.4            | 318           | 22082R-05-01       |       |              |
| C1   | 10.0             | 3.2            | 199           | 22082R-05-02       |       |              |
| D1   | 10.0             | 2.0            | 229           | 22082R-05-03       |       |              |
| E1   | 10.0             | 2.7            | 118           | 22082R-05-04       |       |              |
| F1   | 10.0             | 2.5            | 74.2          | 22082R-05-05       |       |              |
| G1   | 10.0             | 2.6            | 108           | 22082R-05-06       |       |              |
| H1   | 10.0             | 3.0            | 157           | 22082R-05-07       |       |              |
| A2   | 10.0             | 3.1            | 233           | 22082R-05-08       |       |              |
| B2   | 10.0             | 2.7            | 176           | 22082R-05-09       |       |              |
| C2   | 10.0             | 3.1            | 179           | 22082R-05-10       |       |              |
| D2   | 10.0             | 3.2            | 228           | 22082R-05-11       |       |              |
| E2   | 10.0             | 3.3            | 238           | 22082R-05-12       |       |              |

### A1: Electronic Ladder

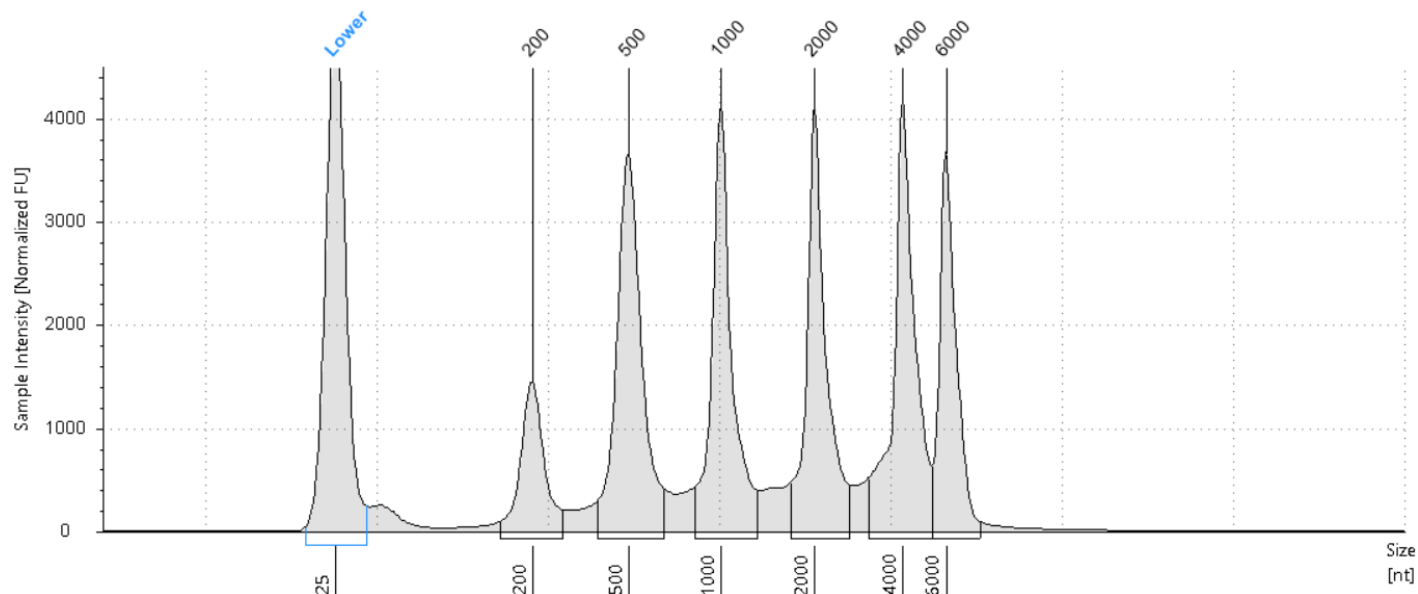

### Sample Table

| Well | RIN <sup>e</sup> | 28S/18S (Area) | Conc. [ng/μl] | Sample Description | Alert | Observations |
|------|------------------|----------------|---------------|--------------------|-------|--------------|
| A1   | -                | -              | 84.9          | Electronic Ladder  |       | Ladder       |

### Peak Table

| Size [nt] | Calibrated Conc. [ng/μl] | Assigned Conc. [ng/μl] | Peak Molarity [nmol/l] | % Integrated Area | Peak Comment | Observations |
|-----------|--------------------------|------------------------|------------------------|-------------------|--------------|--------------|
| 25        | 40.0                     | 40.0                   | 4710                   | -                 |              | Lower Marker |
| 200       | 5.94                     | -                      | 87.4                   | 7.80              |              |              |
| 500       | 15.9                     | -                      | 93.6                   | 20.88             |              |              |
| 1000      | 14.2                     | -                      | 41.8                   | 18.62             |              |              |
| 2000      | 13.8                     | -                      | 20.3                   | 18.11             |              |              |
| 4000      | 15.5                     | -                      | 11.4                   | 20.38             |              |              |
| 6000      | 10.8                     | -                      | 5.31                   | 14.22             |              |              |

B1: 22082R-05-01

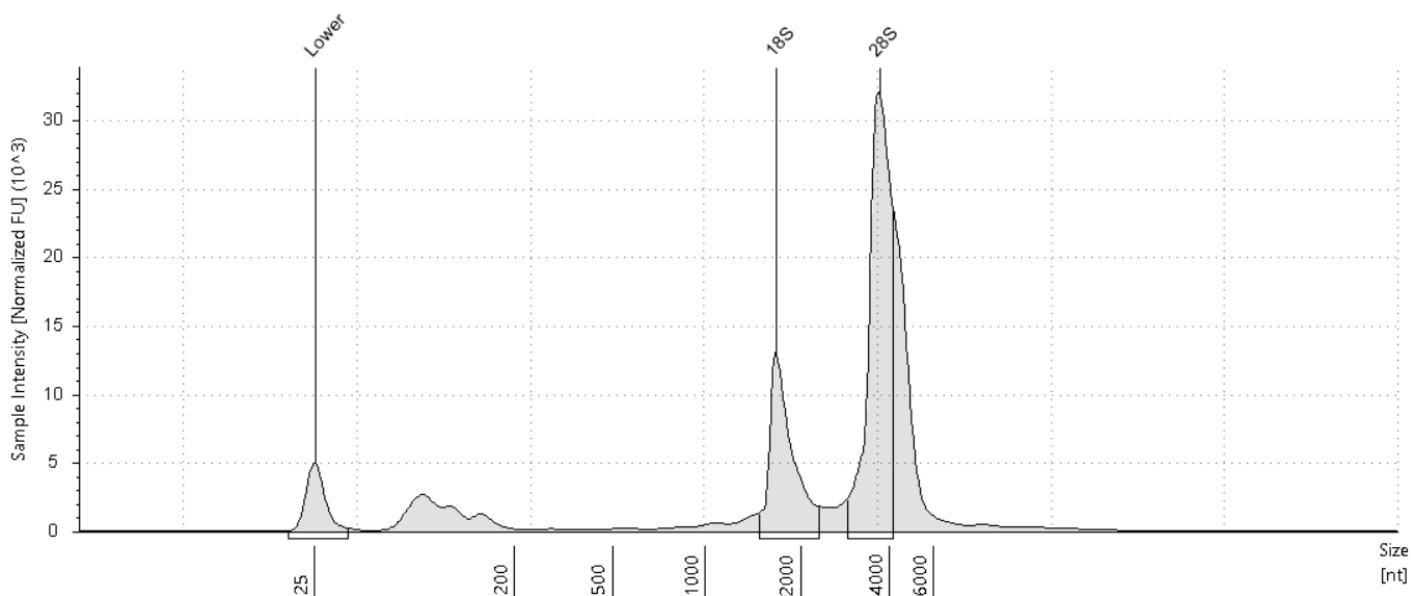

Sample Table

| Well | RIN <sup>e</sup> | 28S/18S (Area) | Conc. [ng/μl] | Sample Description | Alert | Observations |
|------|------------------|----------------|---------------|--------------------|-------|--------------|
| B1   | 10.0             | 2.4            | 318           | 22082R-05-01       |       |              |

Peak Table

| Size [nt] | Calibrated Conc. [ng/μl] | Assigned Conc. [ng/μl] | Peak Molarity [nmol/l] | % Integrated Area | Peak Comment | Observations |
|-----------|--------------------------|------------------------|------------------------|-------------------|--------------|--------------|
| 25        | 40.0                     | 40.0                   | 4710                   | -                 |              | Lower Marker |
| 1668      | 57.2                     | -                      | 101                    | 29.80             |              | 18S          |
| 3683      | 135                      | -                      | 108                    | 70.20             |              | 28S          |

C1: 22082R-05-02

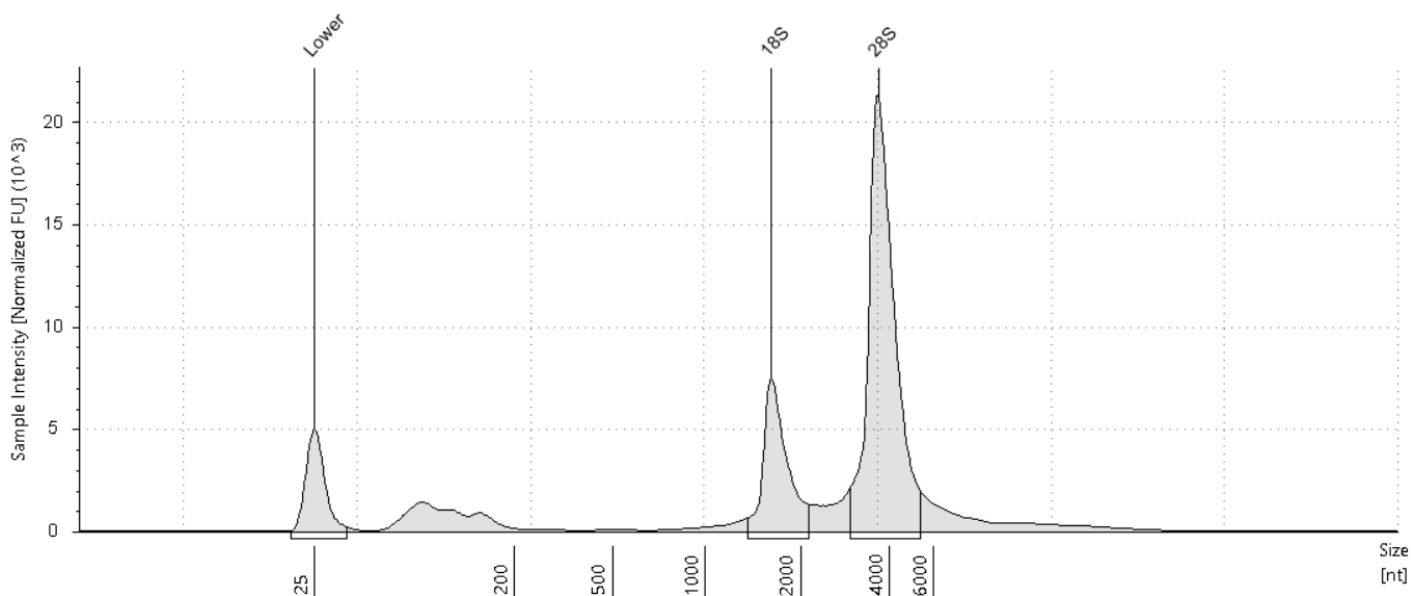

Sample Table

| Well | RIN <sup>e</sup> | 28S/18S (Area) | Conc. [ng/μl] | Sample Description | Alert | Observations |
|------|------------------|----------------|---------------|--------------------|-------|--------------|
| C1   | 10.0             | 3.2            | 199           | 22082R-05-02       |       |              |

Peak Table

| Size [nt] | Calibrated Conc. [ng/μl] | Assigned Conc. [ng/μl] | Peak Molarity [nmol/l] | % Integrated Area | Peak Comment | Observations |
|-----------|--------------------------|------------------------|------------------------|-------------------|--------------|--------------|
| 25        | 40.0                     | 40.0                   | 4710                   | -                 |              | Lower Marker |
| 1616      | 34.9                     | -                      | 63.5                   | 23.98             |              | 18S          |
| 3671      | 111                      | -                      | 88.6                   | 76.02             |              | 28S          |

D1: 22082R-05-03

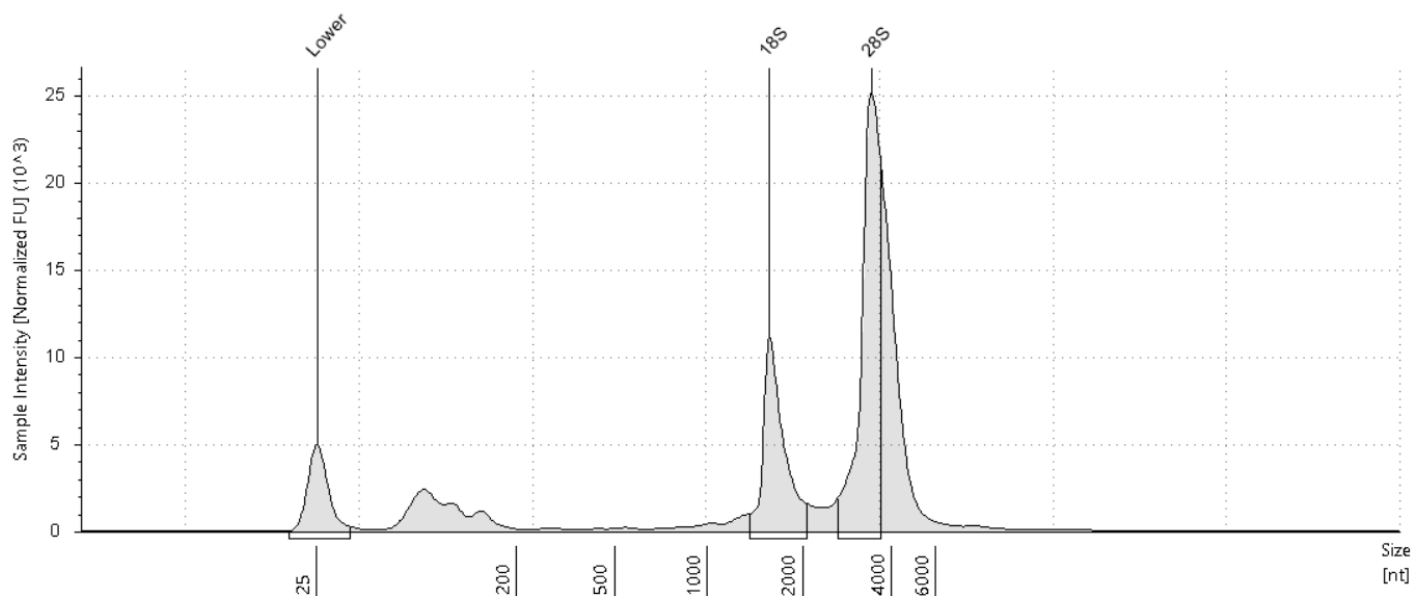

Sample Table

| Well | RIN <sup>e</sup> | 28S/18S (Area) | Conc. [ng/μl] | Sample Description | Alert | Observations |
|------|------------------|----------------|---------------|--------------------|-------|--------------|
| D1   | 10.0             | 2.0            | 229           | 22082R-05-03       |       |              |

Peak Table

| Size [nt] | Calibrated Conc. [ng/μl] | Assigned Conc. [ng/μl] | Peak Molarity [nmol/l] | % Integrated Area | Peak Comment | Observations |
|-----------|--------------------------|------------------------|------------------------|-------------------|--------------|--------------|
| 25        | 40.0                     | 40.0                   | 4710                   | -                 |              | Lower Marker |
| 1570      | 42.3                     | -                      | 79.3                   | 33.29             |              | 18S          |
| 3424      | 84.8                     | -                      | 72.9                   | 66.71             |              | 28S          |

E1: 22082R-05-04

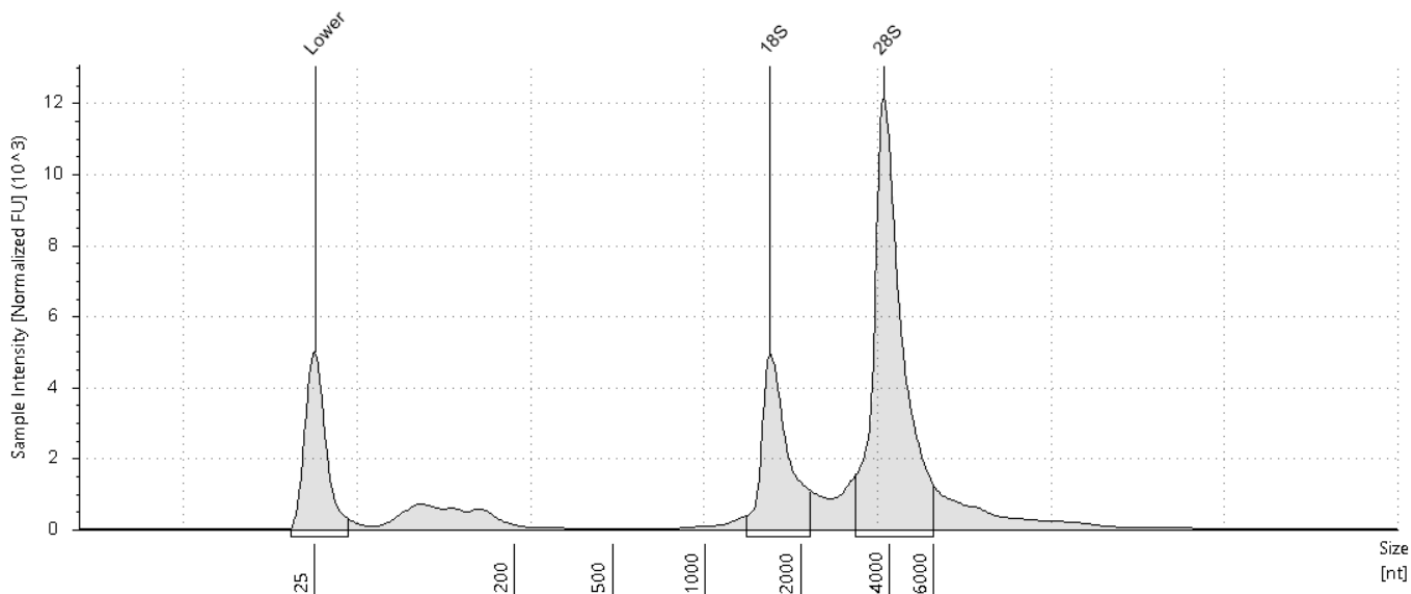

Sample Table

| Well | RIN <sup>e</sup> | 28S/18S (Area) | Conc. [ng/μl] | Sample Description | Alert | Observations |
|------|------------------|----------------|---------------|--------------------|-------|--------------|
| E1   | 10.0             | 2.7            | 118           | 22082R-05-04       |       |              |

Peak Table

| Size [nt] | Calibrated Conc. [ng/μl] | Assigned Conc. [ng/μl] | Peak Molarity [nmol/l] | % Integrated Area | Peak Comment | Observations |
|-----------|--------------------------|------------------------|------------------------|-------------------|--------------|--------------|
| 25        | 40.0                     | 40.0                   | 4710                   | -                 |              | Lower Marker |
| 1606      | 23.3                     | -                      | 42.7                   | 27.33             |              | 18S          |
| 3822      | 62.0                     | -                      | 47.7                   | 72.67             |              | 28S          |

F1: 22082R-05-05

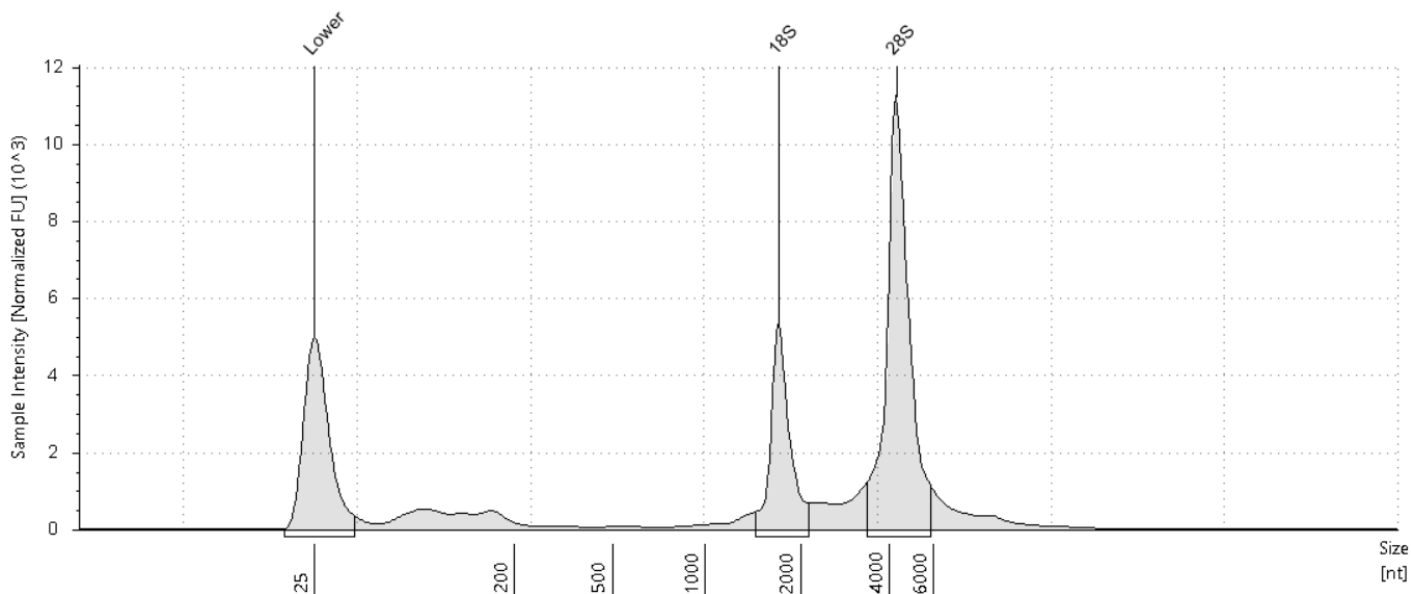

Sample Table

| Well | RIN <sup>e</sup> | 28S/18S (Area) | Conc. [ng/μl] | Sample Description | Alert | Observations |
|------|------------------|----------------|---------------|--------------------|-------|--------------|
| F1   | 10.0             | 2.5            | 74.2          | 22082R-05-05       |       |              |

Peak Table

| Size [nt] | Calibrated Conc. [ng/μl] | Assigned Conc. [ng/μl] | Peak Molarity [nmol/l] | % Integrated Area | Peak Comment | Observations |
|-----------|--------------------------|------------------------|------------------------|-------------------|--------------|--------------|
| 25        | 40.0                     | 40.0                   | 4710                   | -                 |              | Lower Marker |
| 1711      | 14.7                     | -                      | 25.4                   | 28.55             |              | 18S          |
| 4265      | 36.9                     | -                      | 25.5                   | 71.45             |              | 28S          |



G1: 22082R-05-06

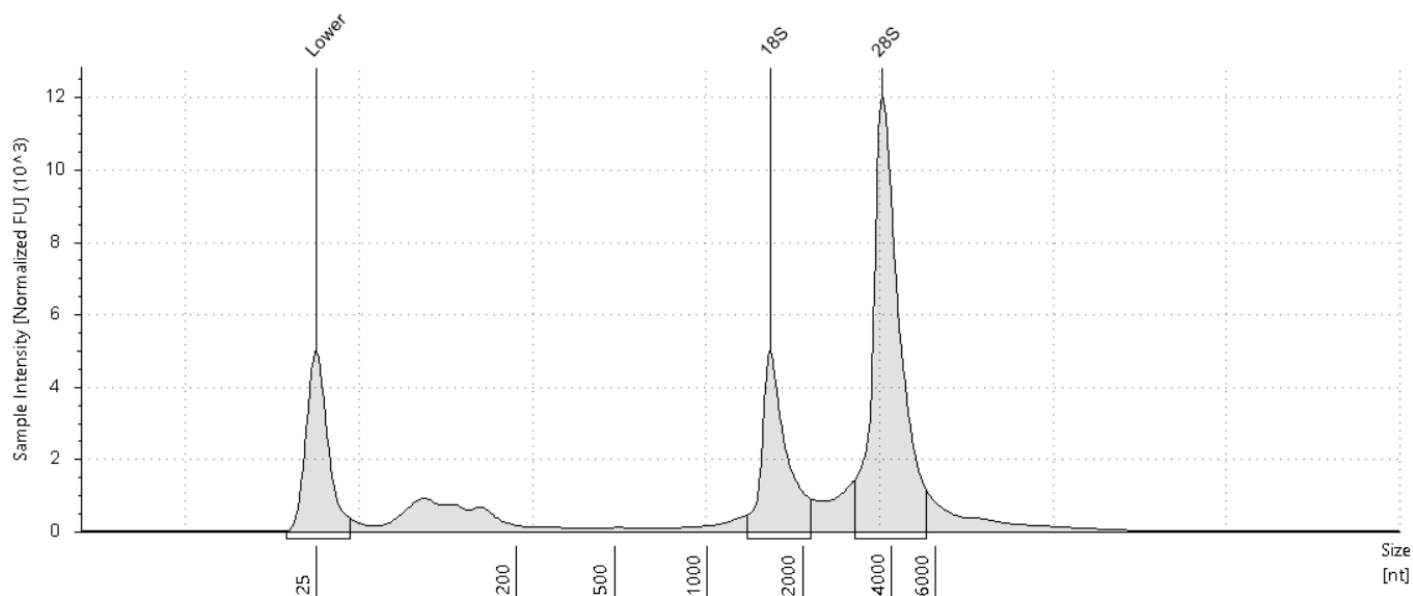

Sample Table

| Well | RIN <sup>e</sup> | 28S/18S (Area) | Conc. [ng/μl] | Sample Description | Alert | Observations |
|------|------------------|----------------|---------------|--------------------|-------|--------------|
| G1   | 10.0             | 2.6            | 108           | 22082R-05-06       |       |              |

Peak Table

| Size [nt] | Calibrated Conc. [ng/μl] | Assigned Conc. [ng/μl] | Peak Molarity [nmol/l] | % Integrated Area | Peak Comment | Observations |
|-----------|--------------------------|------------------------|------------------------|-------------------|--------------|--------------|
| 25        | 40.0                     | 40.0                   | 4710                   | -                 |              | Lower Marker |
| 1590      | 21.0                     | -                      | 38.9                   | 27.53             |              | 18S          |
| 3730      | 55.4                     | -                      | 43.6                   | 72.47             |              | 28S          |

H1: 22082R-05-07

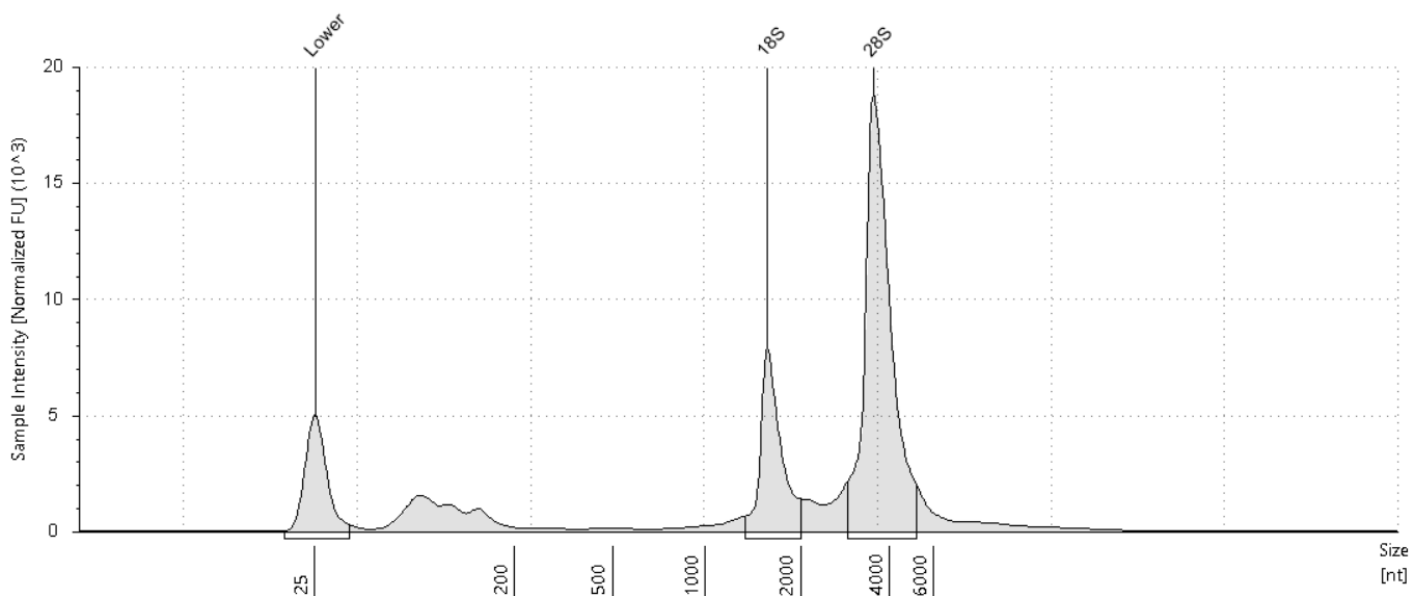

Sample Table

| Well | RIN <sup>e</sup> | 28S/18S (Area) | Conc. [ng/μl] | Sample Description | Alert | Observations |
|------|------------------|----------------|---------------|--------------------|-------|--------------|
| H1   | 10.0             | 3.0            | 157           | 22082R-05-07       |       |              |

Peak Table

| Size [nt] | Calibrated Conc. [ng/μl] | Assigned Conc. [ng/μl] | Peak Molarity [nmol/l] | % Integrated Area | Peak Comment | Observations |
|-----------|--------------------------|------------------------|------------------------|-------------------|--------------|--------------|
| 25        | 40.0                     | 40.0                   | 4710                   | -                 |              | Lower Marker |
| 1571      | 27.9                     | -                      | 52.2                   | 24.94             |              | 18S          |
| 3536      | 84.0                     | -                      | 69.9                   | 75.06             |              | 28S          |

A2: 22082R-05-08

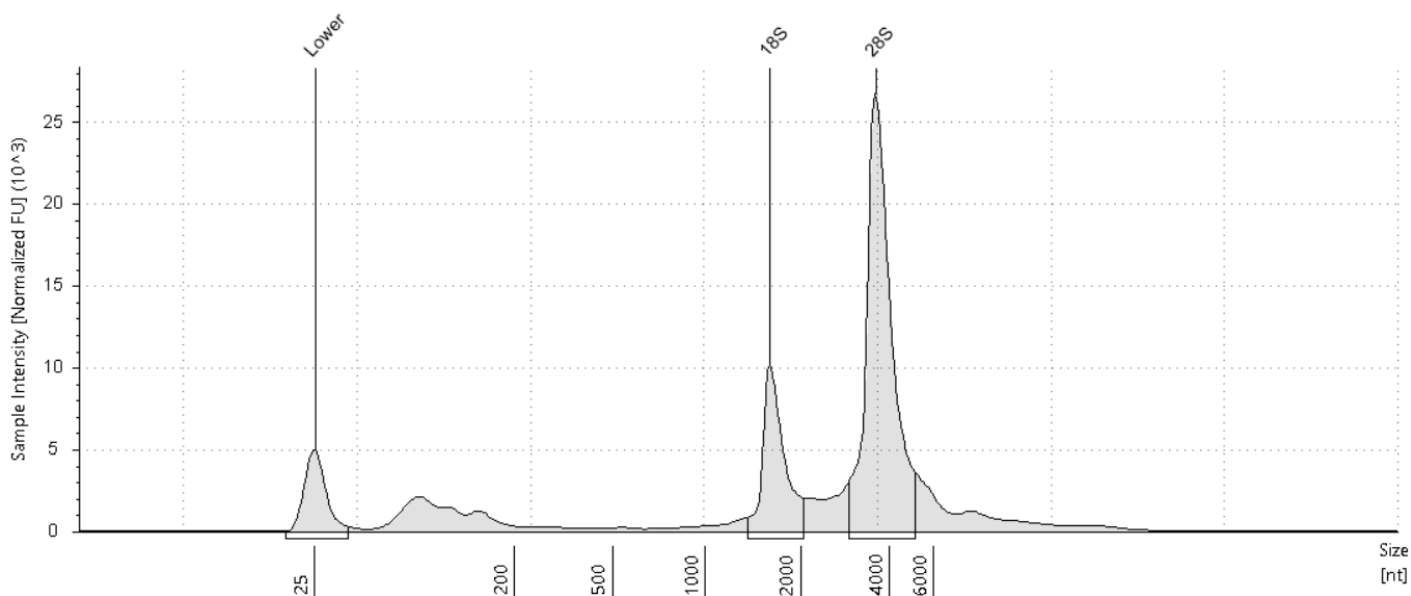

#### Sample Table

| Well | RIN <sup>e</sup> | 28S/18S (Area) | Conc. [ng/μl] | Sample Description | Alert | Observations |
|------|------------------|----------------|---------------|--------------------|-------|--------------|
| A2   | 10.0             | 3.1            | 233           | 22082R-05-08       |       |              |

#### Peak Table

| Size [nt] | Calibrated Conc. [ng/μl] | Assigned Conc. [ng/μl] | Peak Molarity [nmol/l] | % Integrated Area | Peak Comment | Observations |
|-----------|--------------------------|------------------------|------------------------|-------------------|--------------|--------------|
| 25        | 40.0                     | 40.0                   | 4710                   | -                 |              | Lower Marker |
| 1600      | 38.1                     | -                      | 70.0                   | 24.47             |              | 18S          |
| 3575      | 118                      | -                      | 96.7                   | 75.53             |              | 28S          |

B2: 22082R-05-09

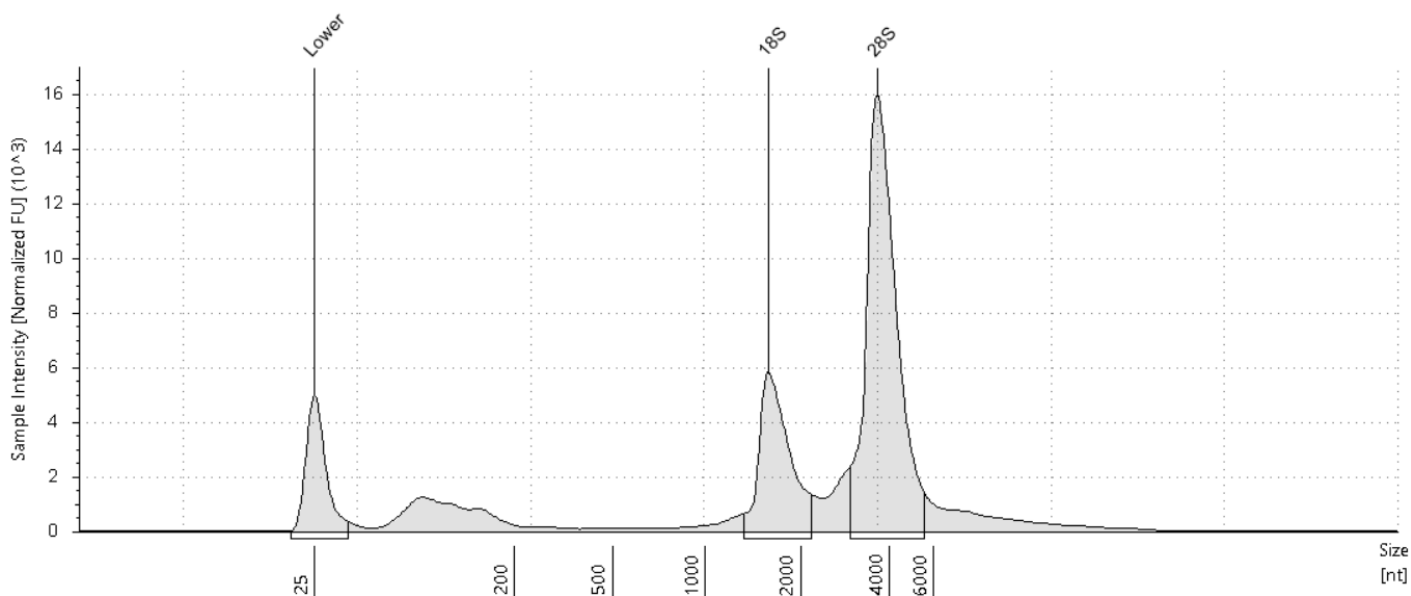

Sample Table

| Well | RIN <sup>e</sup> | 28S/18S (Area) | Conc. [ng/μl] | Sample Description | Alert | Observations |
|------|------------------|----------------|---------------|--------------------|-------|--------------|
| B2   | 10.0             | 2.7            | 176           | 22082R-05-09       |       |              |

Peak Table

| Size [nt] | Calibrated Conc. [ng/μl] | Assigned Conc. [ng/μl] | Peak Molarity [nmol/l] | % Integrated Area | Peak Comment | Observations |
|-----------|--------------------------|------------------------|------------------------|-------------------|--------------|--------------|
| 25        | 40.0                     | 40.0                   | 4710                   | -                 |              | Lower Marker |
| 1590      | 33.6                     | -                      | 62.1                   | 26.72             |              | 18S          |
| 3659      | 92.2                     | -                      | 74.1                   | 73.28             |              | 28S          |

C2: 22082R-05-10

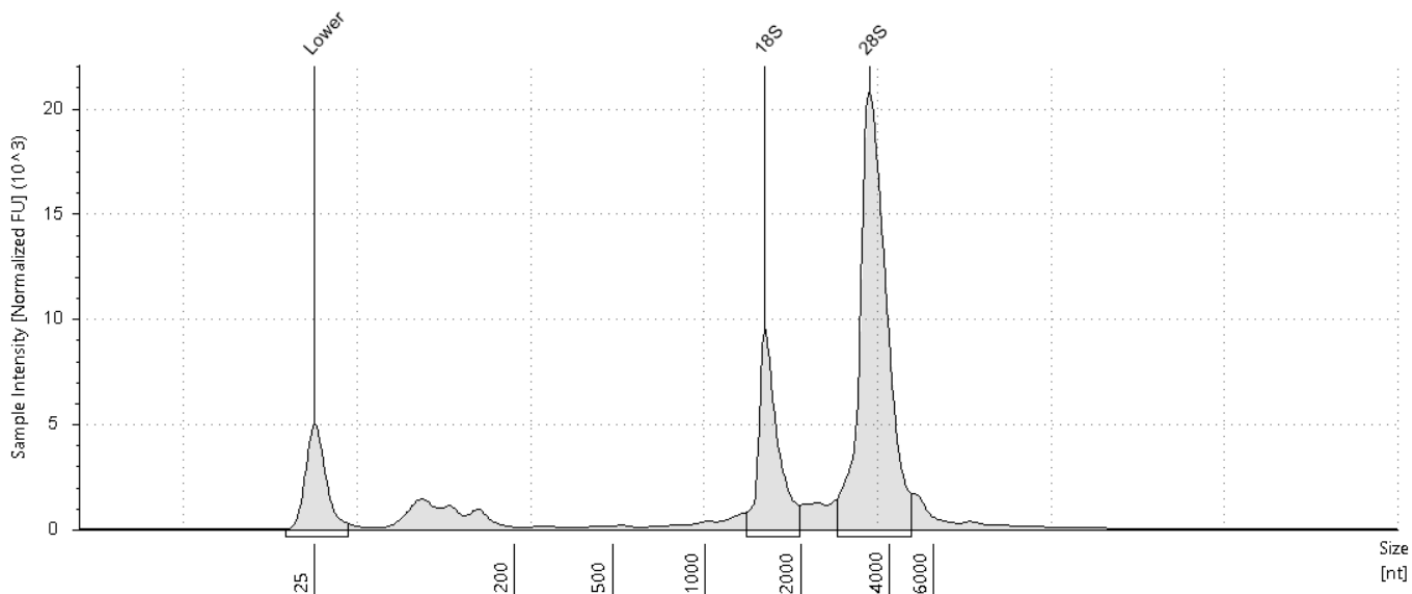

Sample Table

| Well | RIN <sup>e</sup> | 28S/18S (Area) | Conc. [ng/μl] | Sample Description | Alert | Observations |
|------|------------------|----------------|---------------|--------------------|-------|--------------|
| C2   | 10.0             | 3.1            | 179           | 22082R-05-10       |       |              |

Peak Table

| Size [nt] | Calibrated Conc. [ng/μl] | Assigned Conc. [ng/μl] | Peak Molarity [nmol/l] | % Integrated Area | Peak Comment | Observations |
|-----------|--------------------------|------------------------|------------------------|-------------------|--------------|--------------|
| 25        | 40.0                     | 40.0                   | 4710                   | -                 |              | Lower Marker |
| 1545      | 33.0                     | -                      | 62.8                   | 24.14             |              | 18S          |
| 3417      | 104                      | -                      | 89.2                   | 75.86             |              | 28S          |

D2: 22082R-05-11

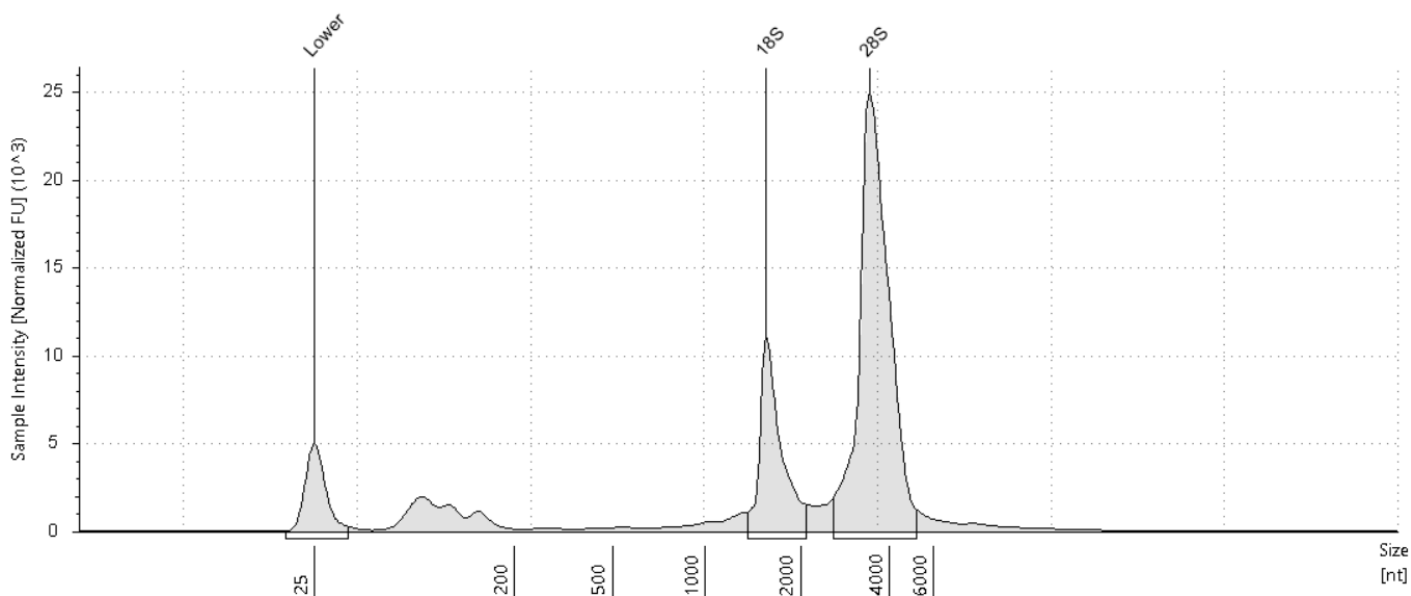

Sample Table

| Well | RIN <sup>e</sup> | 28S/18S (Area) | Conc. [ng/μl] | Sample Description | Alert | Observations |
|------|------------------|----------------|---------------|--------------------|-------|--------------|
| D2   | 10.0             | 3.2            | 228           | 22082R-05-11       |       |              |

Peak Table

| Size [nt] | Calibrated Conc. [ng/μl] | Assigned Conc. [ng/μl] | Peak Molarity [nmol/l] | % Integrated Area | Peak Comment | Observations |
|-----------|--------------------------|------------------------|------------------------|-------------------|--------------|--------------|
| 25        | 40.0                     | 40.0                   | 4710                   | -                 |              | Lower Marker |
| 1562      | 42.6                     | -                      | 80.2                   | 23.80             |              | 18S          |
| 3442      | 136                      | -                      | 116                    | 76.20             |              | 28S          |

E2: 22082R-05-12

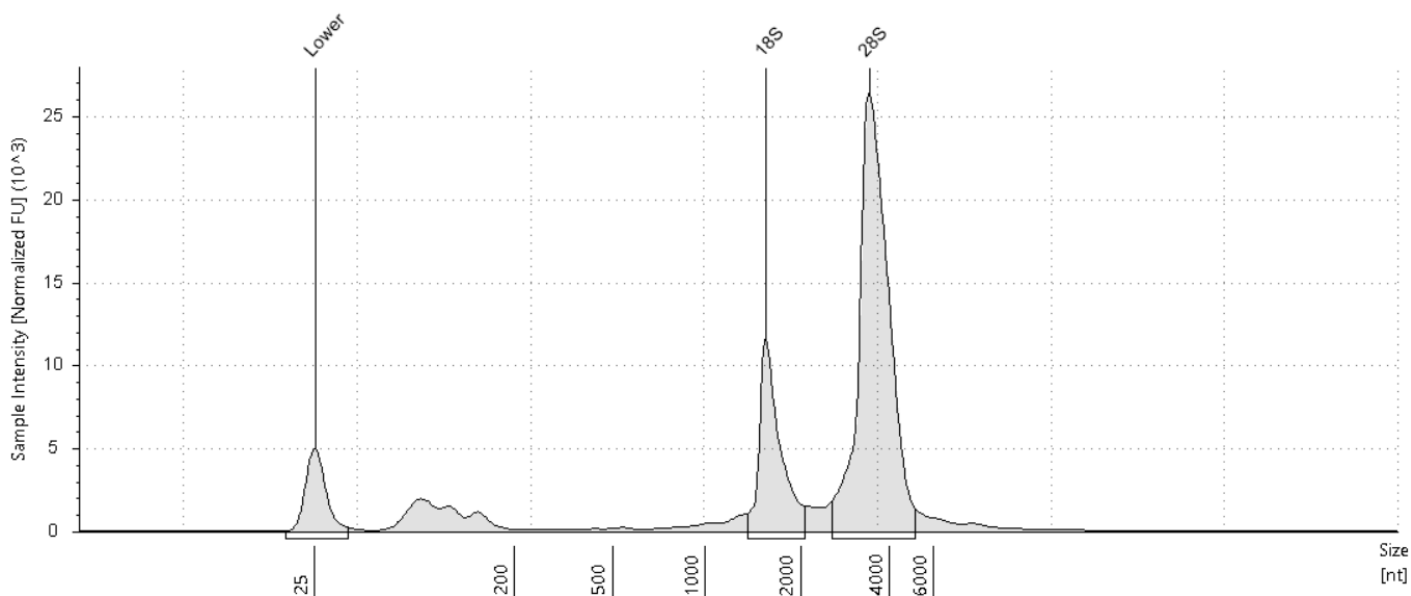

Sample Table

| Well | RIN <sup>e</sup> | 28S/18S (Area) | Conc. [ng/μl] | Sample Description | Alert | Observations |
|------|------------------|----------------|---------------|--------------------|-------|--------------|
| E2   | 10.0             | 3.3            | 238           | 22082R-05-12       |       |              |

Peak Table

| Size [nt] | Calibrated Conc. [ng/μl] | Assigned Conc. [ng/μl] | Peak Molarity [nmol/l] | % Integrated Area | Peak Comment | Observations |
|-----------|--------------------------|------------------------|------------------------|-------------------|--------------|--------------|
| 25        | 40.0                     | 40.0                   | 4710                   | -                 |              | Lower Marker |
| 1550      | 44.5                     | -                      | 84.5                   | 23.44             |              | 18S          |
| 3401      | 146                      | -                      | 126                    | 76.56             |              | 28S          |

Filename: 22082-05-13-24-IQC-TS-01252023.cHSRNA

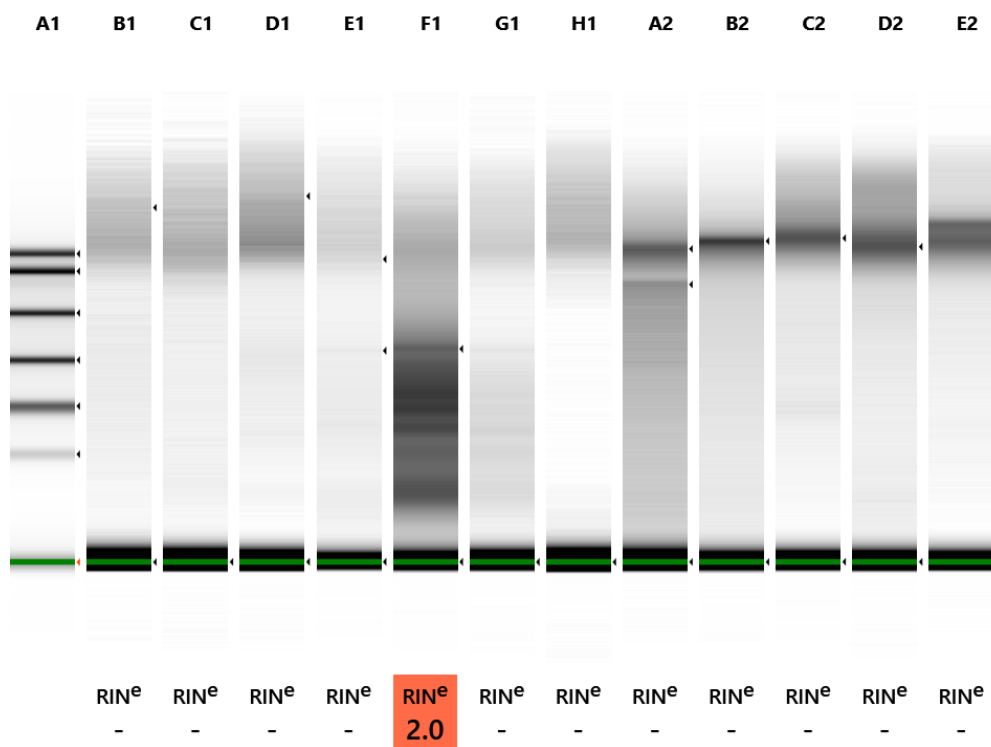

Default image (Contrast 50%), Image is Scaled to Sample

### Sample Info

| Well | RIN <sup>e</sup> | 28S/18S (Area) | Conc. [pg/μl] | Sample Description | Alert | Observations |
|------|------------------|----------------|---------------|--------------------|-------|--------------|
| A1   | -                | -              | 3750          | Electronic Ladder  |       | Ladder       |
| B1   | -                | -              | 135           | 22082R-05-13       |       |              |
| C1   | -                | -              | 129           | 22082R-05-14       |       |              |
| D1   | -                | -              | 198           | 22082R-05-15       |       |              |
| E1   | -                | -              | 212           | 22082R-05-16       |       |              |
| F1   | 2.0              | -              | 906           | 22082R-05-17       |       |              |
| G1   | -                | -              | 179           | 22082R-05-18       |       |              |
| H1   | -                | -              | 87.4          | 22082R-05-19       |       |              |
| A2   | -                | -              | 373           | 22082R-05-20       |       |              |
| B2   | -                | -              | 321           | 22082R-05-21       |       |              |
| C2   | -                | -              | 282           | 22082R-05-22       |       |              |
| D2   | -                | -              | 281           | 22082R-05-23       |       |              |
| E2   | -                | -              | 238           | 22082R-05-24       |       |              |



### A1: Electronic Ladder

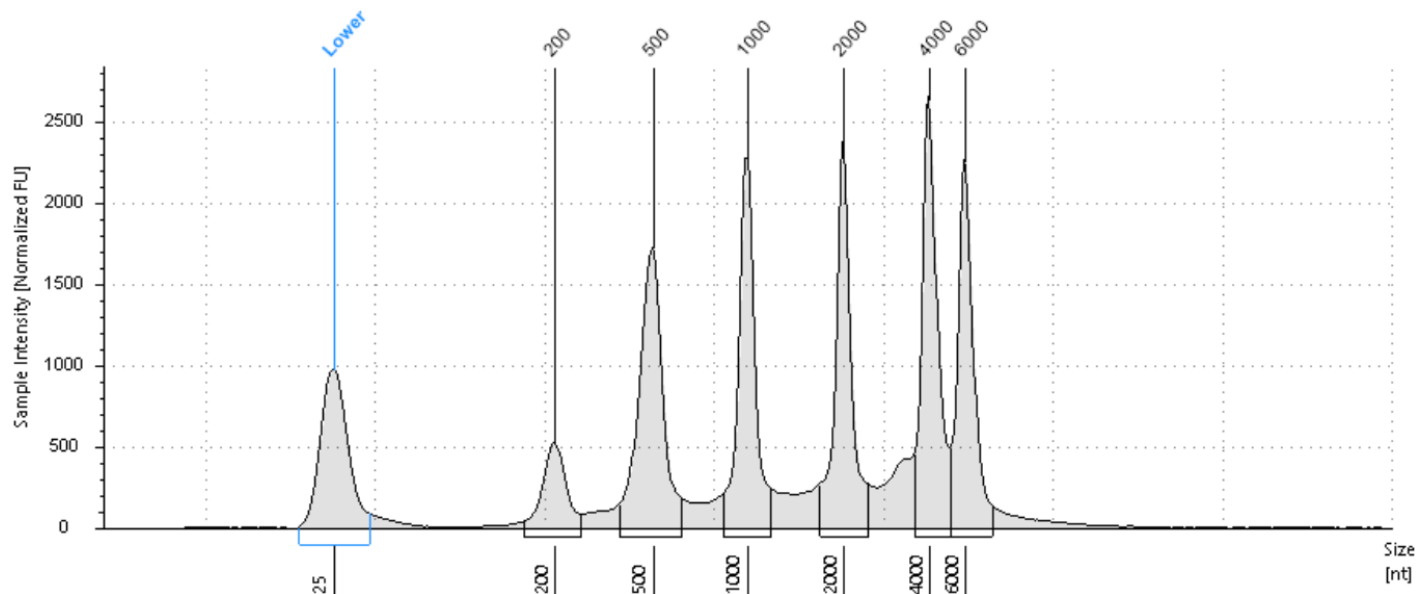

### Sample Table

| Well | RIN <sup>e</sup> | 28S/18S (Area) | Conc. [pg/μl] | Sample Description | Alert | Observations |
|------|------------------|----------------|---------------|--------------------|-------|--------------|
| A1   | -                | -              | 3750          | Electronic Ladder  |       | Ladder       |

### Peak Table

| Size [nt] | Calibrated Conc. [pg/μl] | Assigned Conc. [pg/μl] | Peak Molarity [pmol/l] | % Integrated Area | Peak Comment | Observations |
|-----------|--------------------------|------------------------|------------------------|-------------------|--------------|--------------|
| 25        | 700                      | 700                    | 82400                  | -                 |              | Lower Marker |
| 200       | 189                      | -                      | 2770                   | 5.98              |              |              |
| 500       | 638                      | -                      | 3760                   | 20.25             |              |              |
| 1000      | 557                      | -                      | 1640                   | 17.66             |              |              |
| 2000      | 580                      | -                      | 854                    | 18.42             |              |              |
| 4000      | 634                      | -                      | 466                    | 20.11             |              |              |
| 6000      | 554                      | -                      | 272                    | 17.58             |              |              |

B1: 22082R-05-13

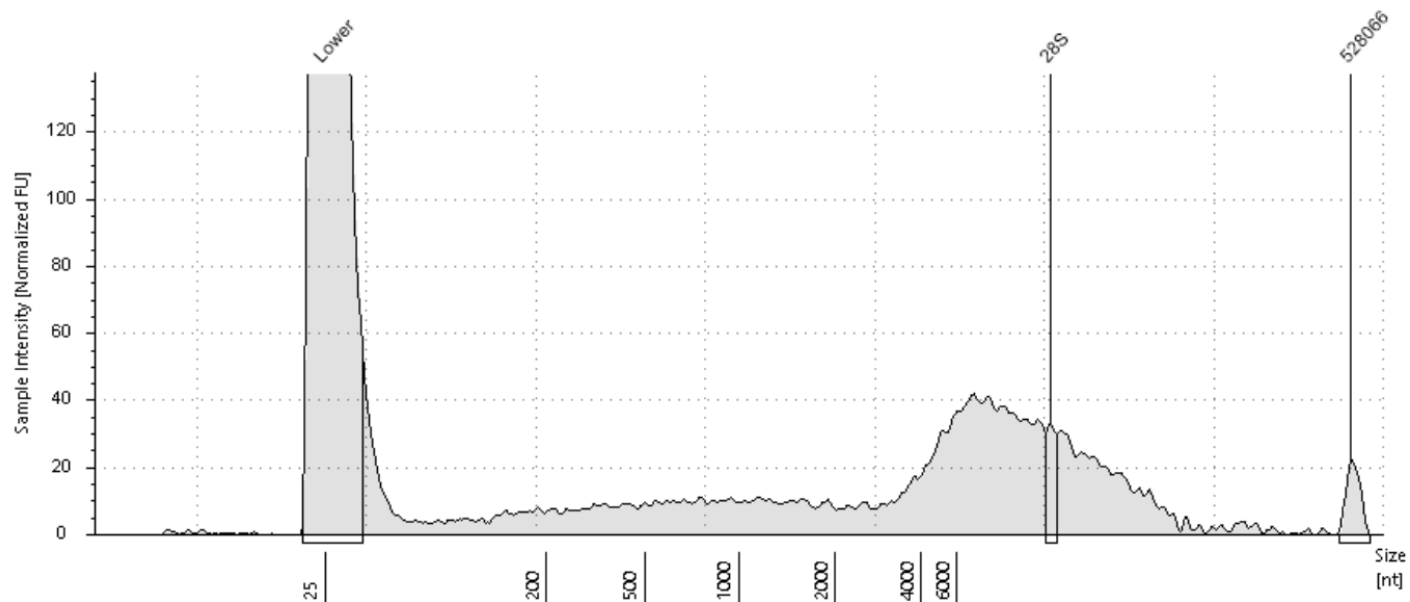

Sample Table

| Well | RIN <sup>e</sup> | 28S/18S (Area) | Conc. [pg/μl] | Sample Description | Alert | Observations |
|------|------------------|----------------|---------------|--------------------|-------|--------------|
| B1   | -                | -              | 135           | 22082R-05-13       |       |              |

Peak Table

| Size [nt] | Calibrated Conc. [pg/μl] | Assigned Conc. [pg/μl] | Peak Molarity [pmol/l] | % Integrated Area | Peak Comment | Observations |
|-----------|--------------------------|------------------------|------------------------|-------------------|--------------|--------------|
| 25        | 700                      | 700                    | 82400                  | -                 |              | Lower Marker |
| 17500     | 4.07                     | -                      | 0.685                  | 49.71             |              | 28S          |
| 528066    | 4.12                     | -                      | 0.0230                 | 50.29             |              |              |

C1: 22082R-05-14

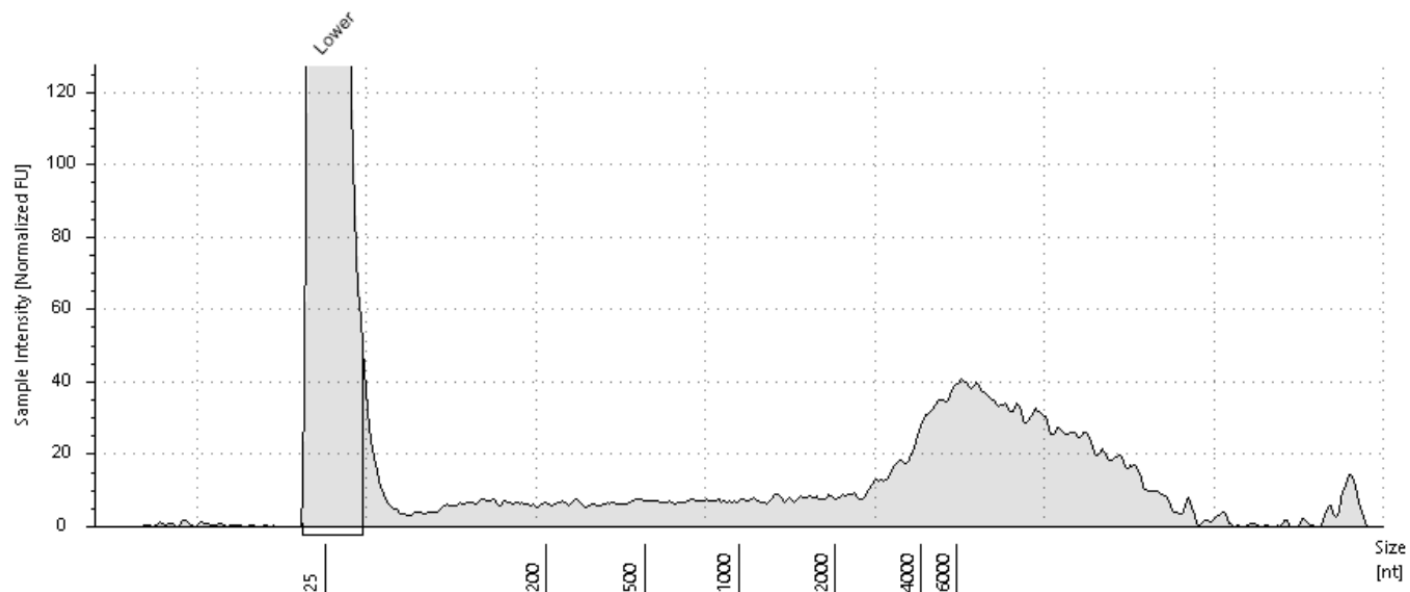

Sample Table

| Well | RIN <sup>e</sup> | 28S/18S (Area) | Conc. [pg/μl] | Sample Description | Alert | Observations |
|------|------------------|----------------|---------------|--------------------|-------|--------------|
| C1   | -                | -              | 129           | 22082R-05-14       |       |              |

Peak Table

| Size [nt] | Calibrated Conc. [pg/μl] | Assigned Conc. [pg/μl] | Peak Molarity [pmol/l] | % Integrated Area | Peak Comment | Observations |
|-----------|--------------------------|------------------------|------------------------|-------------------|--------------|--------------|
| 25        | 700                      | 700                    | 82400                  | -                 |              | Lower Marker |

D1: 22082R-05-15

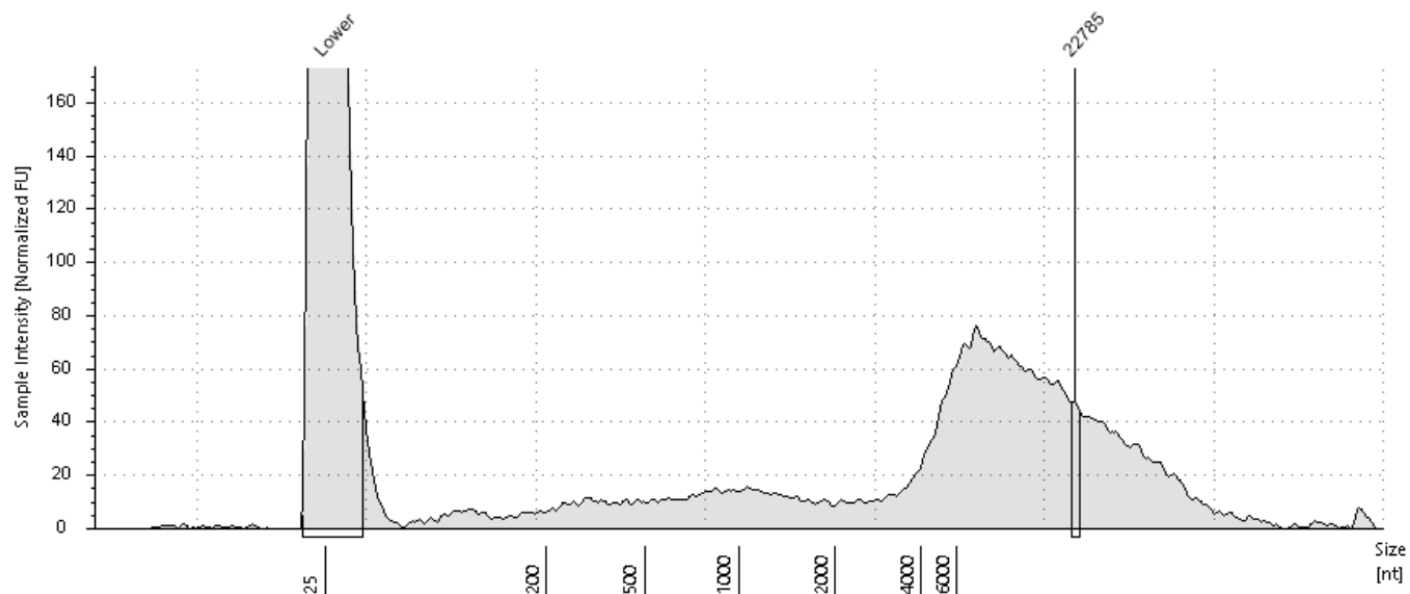

Sample Table

| Well | RIN <sup>e</sup> | 28S/18S (Area) | Conc. [pg/μl] | Sample Description | Alert | Observations |
|------|------------------|----------------|---------------|--------------------|-------|--------------|
| D1   | -                | -              | 198           | 22082R-05-15       |       |              |

Peak Table

| Size [nt] | Calibrated Conc. [pg/μl] | Assigned Conc. [pg/μl] | Peak Molarity [pmol/l] | % Integrated Area | Peak Comment | Observations |
|-----------|--------------------------|------------------------|------------------------|-------------------|--------------|--------------|
| 25        | 700                      | 700                    | 82400                  | -                 |              | Lower Marker |
| 22785     | 4.74                     | -                      | 0.612                  | 100.00            |              |              |

E1: 22082R-05-16

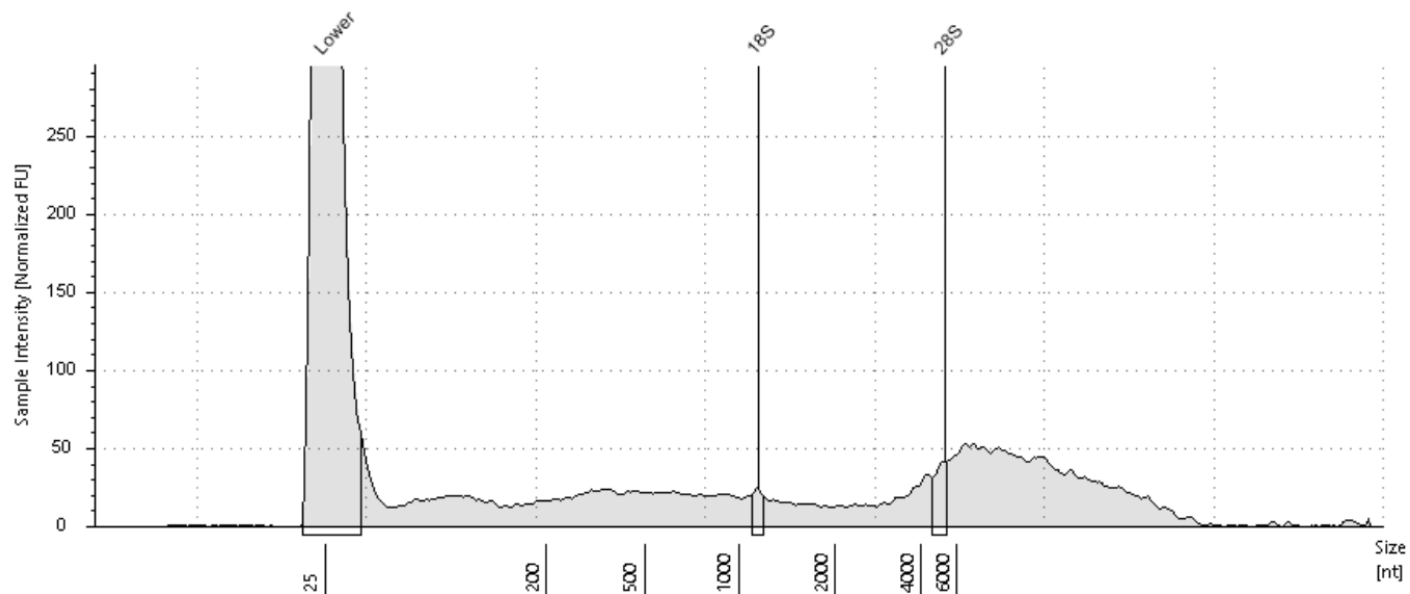

Sample Table

| Well | RIN <sup>e</sup> | 28S/18S (Area) | Conc. [pg/μl] | Sample Description | Alert | Observations |
|------|------------------|----------------|---------------|--------------------|-------|--------------|
| E1   | -                | -              | 212           | 22082R-05-16       |       |              |

Peak Table

| Size [nt] | Calibrated Conc. [pg/μl] | Assigned Conc. [pg/μl] | Peak Molarity [pmol/l] | % Integrated Area | Peak Comment | Observations |
|-----------|--------------------------|------------------------|------------------------|-------------------|--------------|--------------|
| 25        | 700                      | 700                    | 82400                  | -                 |              | Lower Marker |
| 1142      | 3.09                     | -                      | 7.95                   | 31.19             |              | 18S          |
| 5228      | 6.81                     | -                      | 3.83                   | 68.81             |              | 28S          |

F1: 22082R-05-17

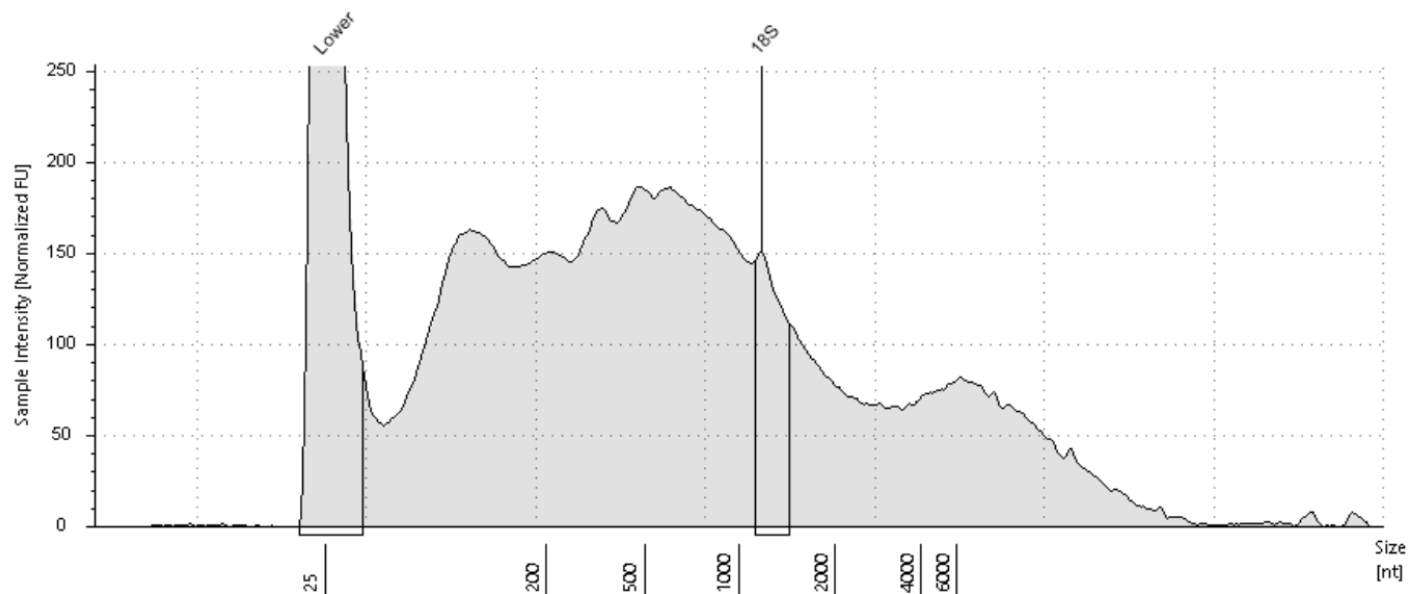

Sample Table

| Well | RIN <sup>e</sup> | 28S/18S (Area) | Conc. [pg/μl] | Sample Description | Alert | Observations |
|------|------------------|----------------|---------------|--------------------|-------|--------------|
| F1   | 2.0              | -              | 906           | 22082R-05-17       |       |              |

Peak Table

| Size [nt] | Calibrated Conc. [pg/μl] | Assigned Conc. [pg/μl] | Peak Molarity [pmol/l] | % Integrated Area | Peak Comment | Observations |
|-----------|--------------------------|------------------------|------------------------|-------------------|--------------|--------------|
| 25        | 700                      | 700                    | 82400                  | -                 |              | Lower Marker |
| 1176      | 50.3                     | -                      | 126                    | 100.00            |              | 18S          |

G1: 22082R-05-18

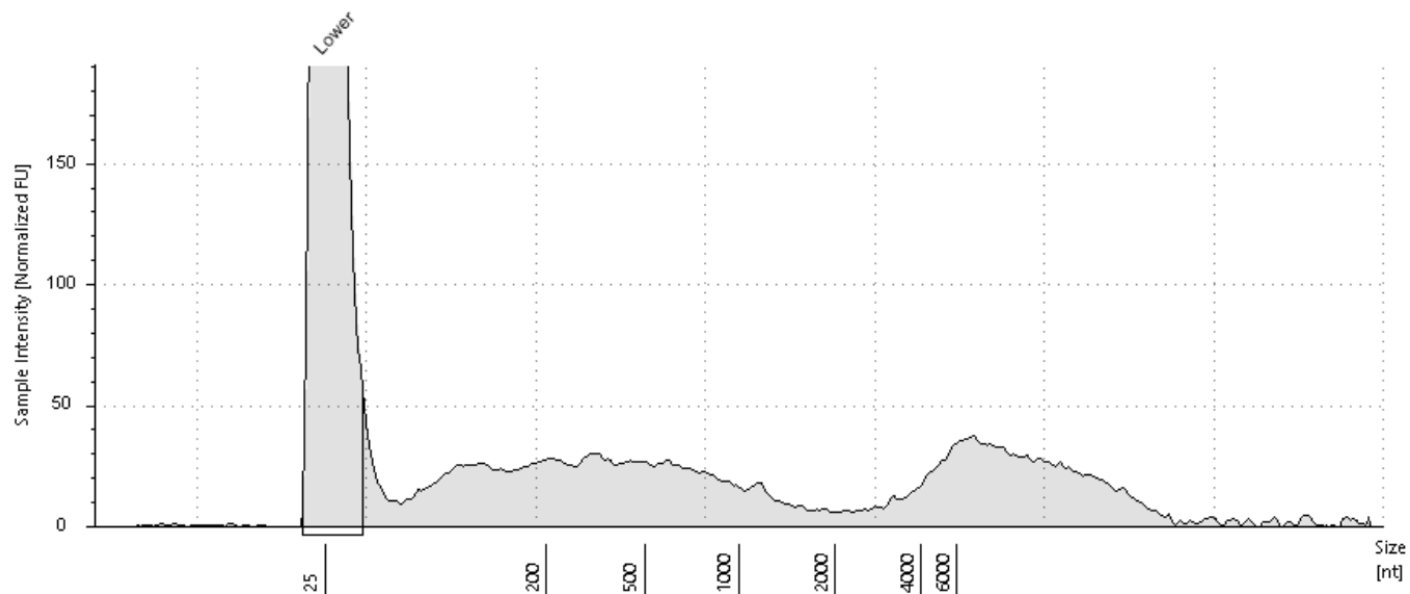

Sample Table

| Well | RIN <sup>e</sup> | 28S/18S (Area) | Conc. [pg/μl] | Sample Description | Alert | Observations |
|------|------------------|----------------|---------------|--------------------|-------|--------------|
| G1   | -                | -              | 179           | 22082R-05-18       |       |              |

Peak Table

| Size [nt] | Calibrated Conc. [pg/μl] | Assigned Conc. [pg/μl] | Peak Molarity [pmol/l] | % Integrated Area | Peak Comment | Observations |
|-----------|--------------------------|------------------------|------------------------|-------------------|--------------|--------------|
| 25        | 700                      | 700                    | 82400                  | -                 |              | Lower Marker |

H1: 22082R-05-19

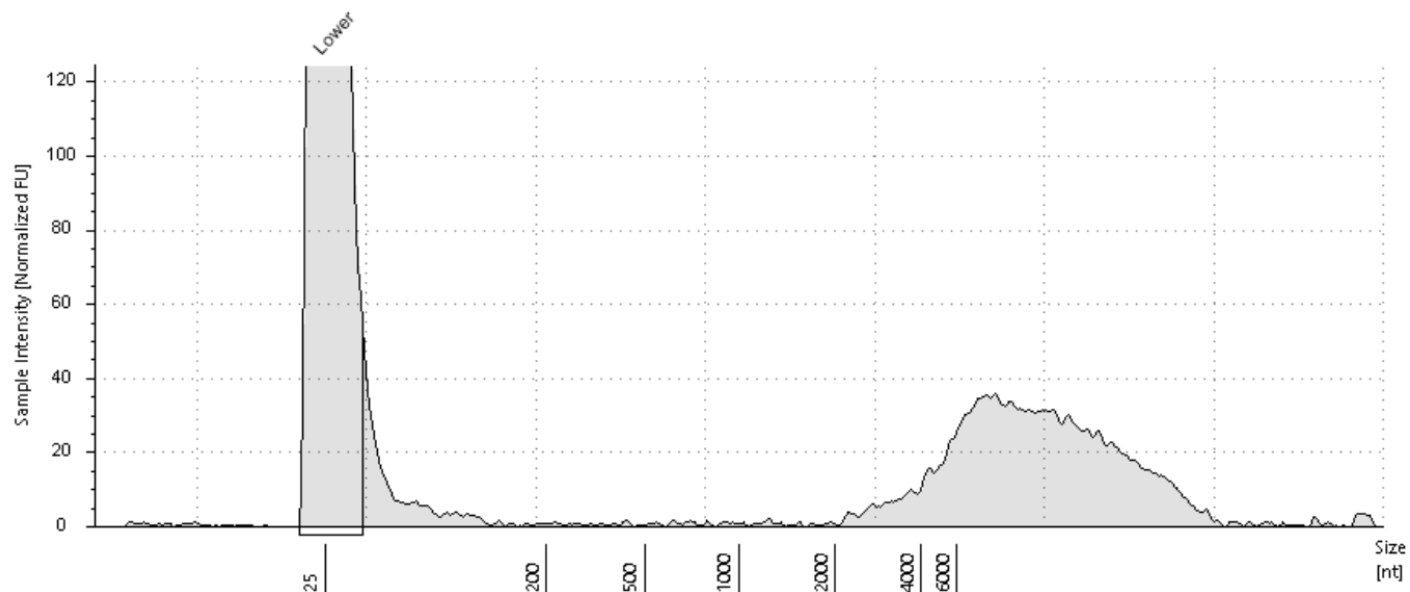

Sample Table

| Well | RIN <sup>e</sup> | 28S/18S (Area) | Conc. [pg/μl] | Sample Description | Alert | Observations |
|------|------------------|----------------|---------------|--------------------|-------|--------------|
| H1   | -                | -              | 87.4          | 22082R-05-19       |       |              |

Peak Table

| Size [nt] | Calibrated Conc. [pg/μl] | Assigned Conc. [pg/μl] | Peak Molarity [pmol/l] | % Integrated Area | Peak Comment | Observations |
|-----------|--------------------------|------------------------|------------------------|-------------------|--------------|--------------|
| 25        | 700                      | 700                    | 82400                  | -                 |              | Lower Marker |



A2: 22082R-05-20

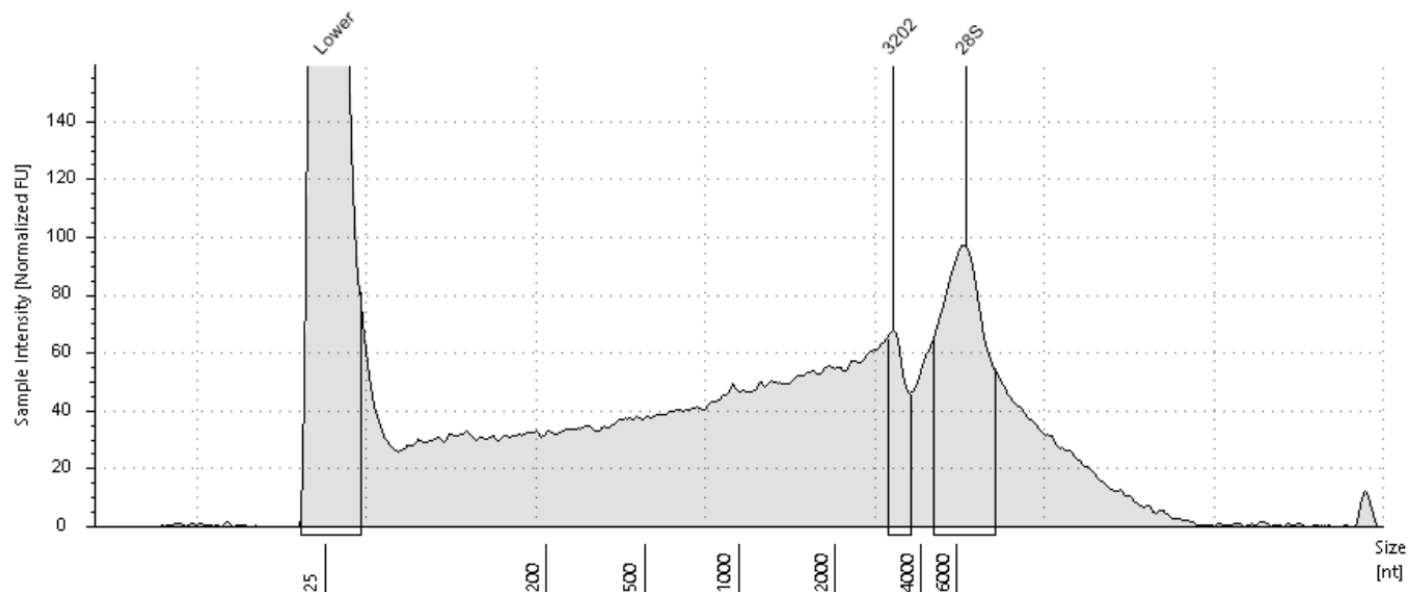

Sample Table

| Well | RIN <sup>e</sup> | 28S/18S (Area) | Conc. [pg/μl] | Sample Description | Alert | Observations |
|------|------------------|----------------|---------------|--------------------|-------|--------------|
| A2   | -                | -              | 373           | 22082R-05-20       |       |              |

Peak Table

| Size [nt] | Calibrated Conc. [pg/μl] | Assigned Conc. [pg/μl] | Peak Molarity [pmol/l] | % Integrated Area | Peak Comment | Observations |
|-----------|--------------------------|------------------------|------------------------|-------------------|--------------|--------------|
| 25        | 700                      | 700                    | 82400                  | -                 |              | Lower Marker |
| 3202      | 16.0                     | -                      | 14.7                   | 22.12             |              |              |
| 6696      | 56.5                     | -                      | 24.8                   | 77.88             |              | 28S          |

B2: 22082R-05-21

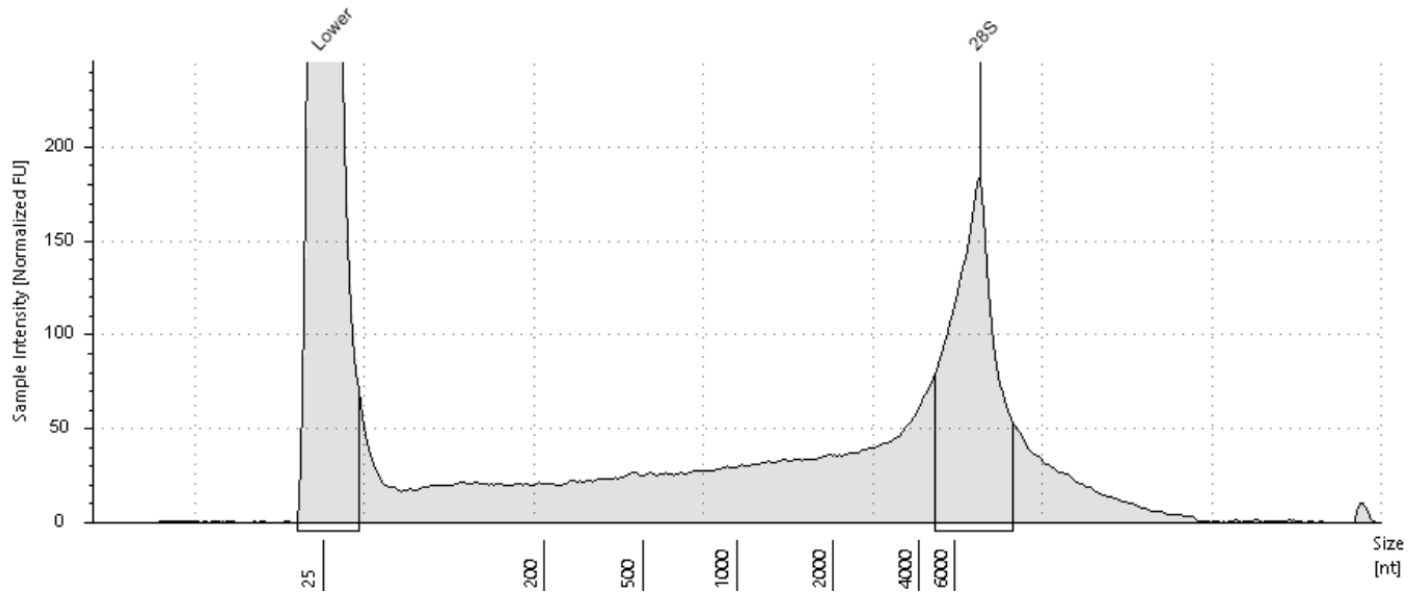

Sample Table

| Well | RIN <sup>e</sup> | 28S/18S (Area) | Conc. [pg/μl] | Sample Description | Alert | Observations |
|------|------------------|----------------|---------------|--------------------|-------|--------------|
| B2   | -                | -              | 321           | 22082R-05-21       |       |              |

Peak Table

| Size [nt] | Calibrated Conc. [pg/μl] | Assigned Conc. [pg/μl] | Peak Molarity [pmol/l] | % Integrated Area | Peak Comment | Observations |
|-----------|--------------------------|------------------------|------------------------|-------------------|--------------|--------------|
| 25        | 700                      | 700                    | 82400                  | -                 |              | Lower Marker |
| 8023      | 101                      | -                      | 37.0                   | 100.00            |              | 28S          |

C2: 22082R-05-22

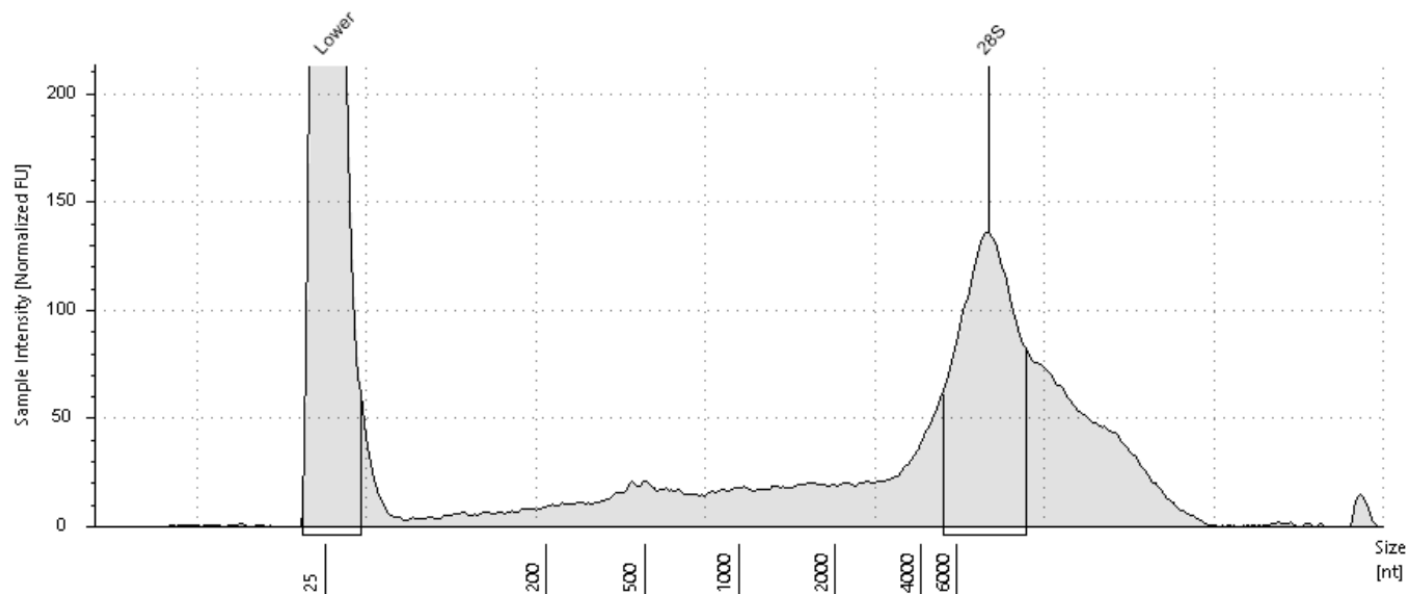

Sample Table

| Well | RIN <sup>e</sup> | 28S/18S (Area) | Conc. [pg/μl] | Sample Description | Alert | Observations |
|------|------------------|----------------|---------------|--------------------|-------|--------------|
| C2   | -                | -              | 282           | 22082R-05-22       |       |              |

Peak Table

| Size [nt] | Calibrated Conc. [pg/μl] | Assigned Conc. [pg/μl] | Peak Molarity [pmol/l] | % Integrated Area | Peak Comment | Observations |
|-----------|--------------------------|------------------------|------------------------|-------------------|--------------|--------------|
| 25        | 700                      | 700                    | 82400                  | -                 |              | Lower Marker |
| 8525      | 100                      | -                      | 34.6                   | 100.00            |              | 28S          |

D2: 22082R-05-23

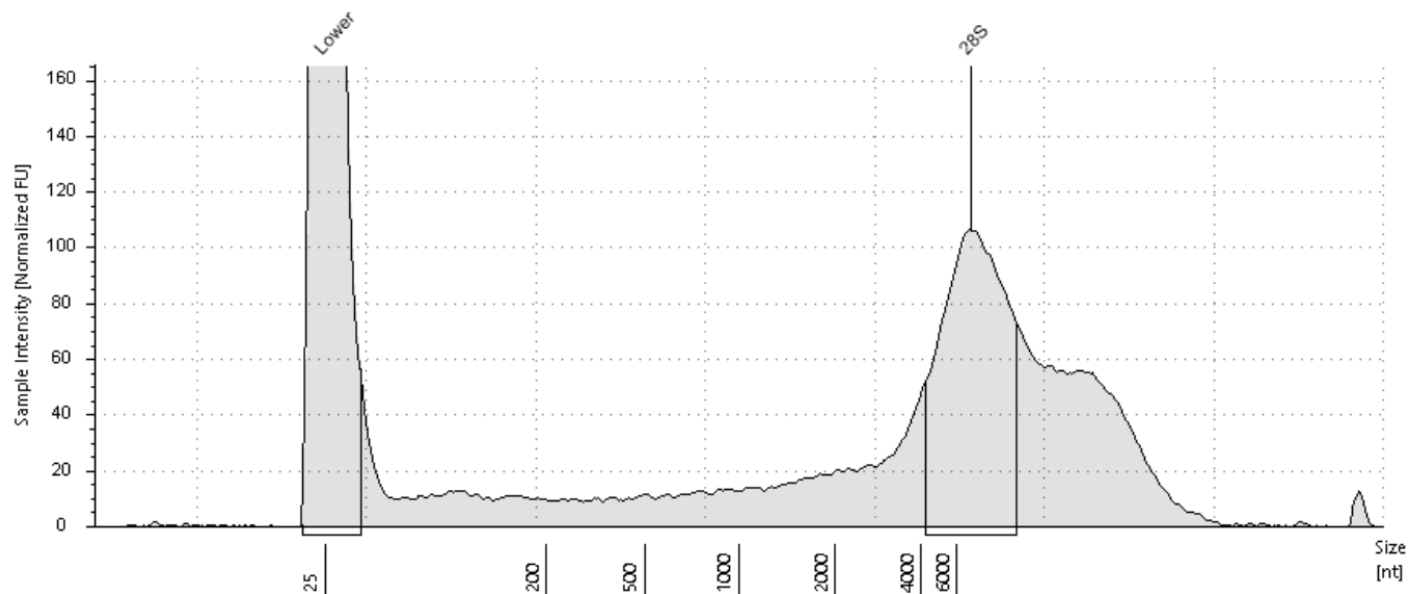

Sample Table

| Well | RIN <sup>e</sup> | 28S/18S (Area) | Conc. [pg/μl] | Sample Description | Alert | Observations |
|------|------------------|----------------|---------------|--------------------|-------|--------------|
| D2   | -                | -              | 281           | 22082R-05-23       |       |              |

Peak Table

| Size [nt] | Calibrated Conc. [pg/μl] | Assigned Conc. [pg/μl] | Peak Molarity [pmol/l] | % Integrated Area | Peak Comment | Observations |
|-----------|--------------------------|------------------------|------------------------|-------------------|--------------|--------------|
| 25        | 700                      | 700                    | 82400                  | -                 |              | Lower Marker |
| 7010      | 94.9                     | -                      | 39.8                   | 100.00            |              | 28S          |

E2: 22082R-05-24

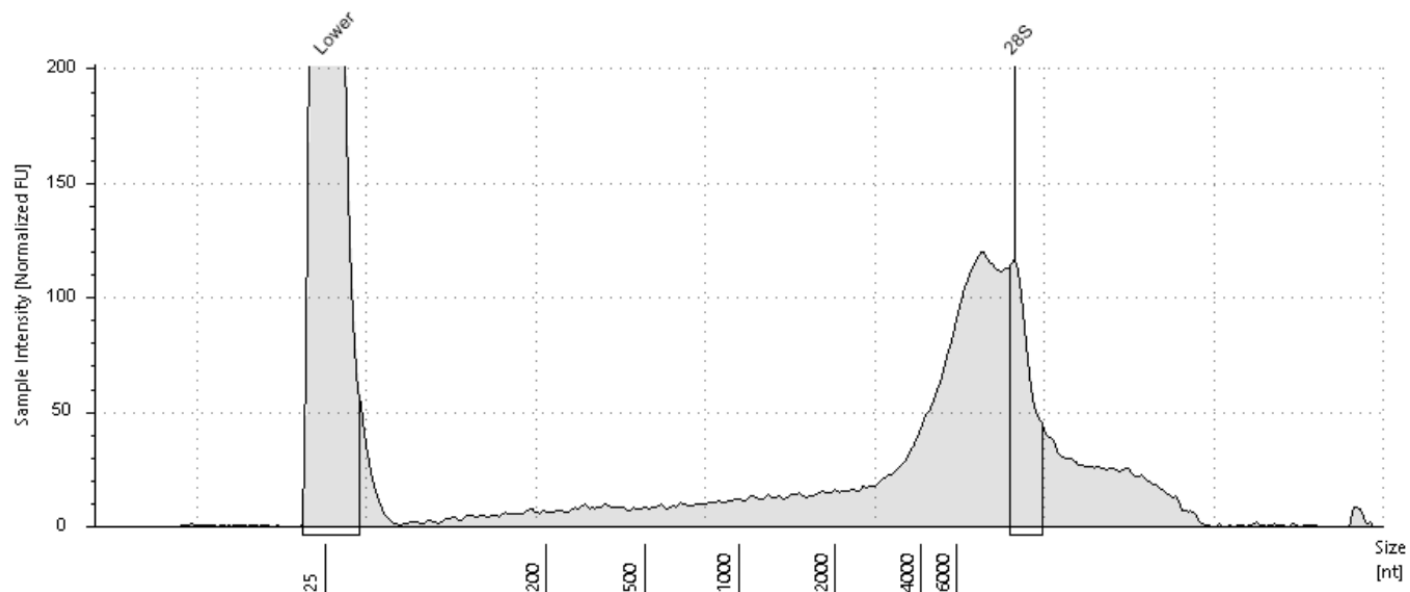

Sample Table

| Well | RIN <sup>e</sup> | 28S/18S (Area) | Conc. [pg/μl] | Sample Description | Alert | Observations |
|------|------------------|----------------|---------------|--------------------|-------|--------------|
| E2   | -                | -              | 238           | 22082R-05-24       |       |              |

Peak Table

| Size [nt] | Calibrated Conc. [pg/μl] | Assigned Conc. [pg/μl] | Peak Molarity [pmol/l] | % Integrated Area | Peak Comment | Observations |
|-----------|--------------------------|------------------------|------------------------|-------------------|--------------|--------------|
| 25        | 700                      | 700                    | 82400                  | -                 |              | Lower Marker |
| 11672     | 34.1                     | -                      | 8.59                   | 100.00            |              | 28S          |
